# Supplementary material for: Characterization and quantification of the phytochemical constituents and anti-inflammatory properties of Lindera aggregata
Source: Royal Society of Chemistry journal article supplement (doi:10.1039/d4ra05643d), 2024-01-01

## Supplementary Material

### **Characterization and quantification of phytochemical constituents and anti-inflammatory properties of *Lindera aggregata***

Song-Song Wen<sup>a,b</sup>, Yong-Jun Liu<sup>a</sup>, Yu-Lin Liu<sup>c</sup>, Yan Zhao<sup>b</sup>, Xiao-Xi Xu<sup>d</sup>, Chang-Chuan Guo<sup>b</sup>, Chong Niu<sup>b</sup>, Wei-Jian Wang<sup>b</sup>, Yu-Wen Xu<sup>b\*</sup>, and Na Zhang<sup>a\*</sup>

<sup>a</sup>Department of Pharmaceutics, Key Laboratory of Chemical Biology (Ministry of Education), School of Pharmaceutical Sciences, Cheeloo College of Medicine, Shandong University, Jinan, 250012, China

<sup>b</sup>NMPA Key Laboratory for Research and Evaluation of Generic Drugs, Shandong Research Center of Engineering and Technology for Consistency Evaluation of Generic Drugs, Shandong Institute for Food and Drug Control, Jinan, 250101, China

<sup>c</sup>Department of Marine Pharmacology, College of Food Science and Technology, Shanghai Ocean University, Shanghai, 201306, China

<sup>d</sup>Beijing Normal University, Beijing, 100875, China

\*Corresponding author

Na Zhang, Department of Pharmaceutics, Key Laboratory of Chemical Biology (Ministry of Education), School of Pharmaceutical Sciences, Cheeloo College of Medicine, Shandong University, E-mail: zhangnancy9@sdu.edu.cn; Yu-Wen Xu, NMPA Key Laboratory for Research and Evaluation of Generic Drugs, Shandong Research Center of Engineering and Technology for Consistency Evaluation of Generic Drugs, Shandong Institute for Food and Drug Control, E-mail: 13553158409@163.com.

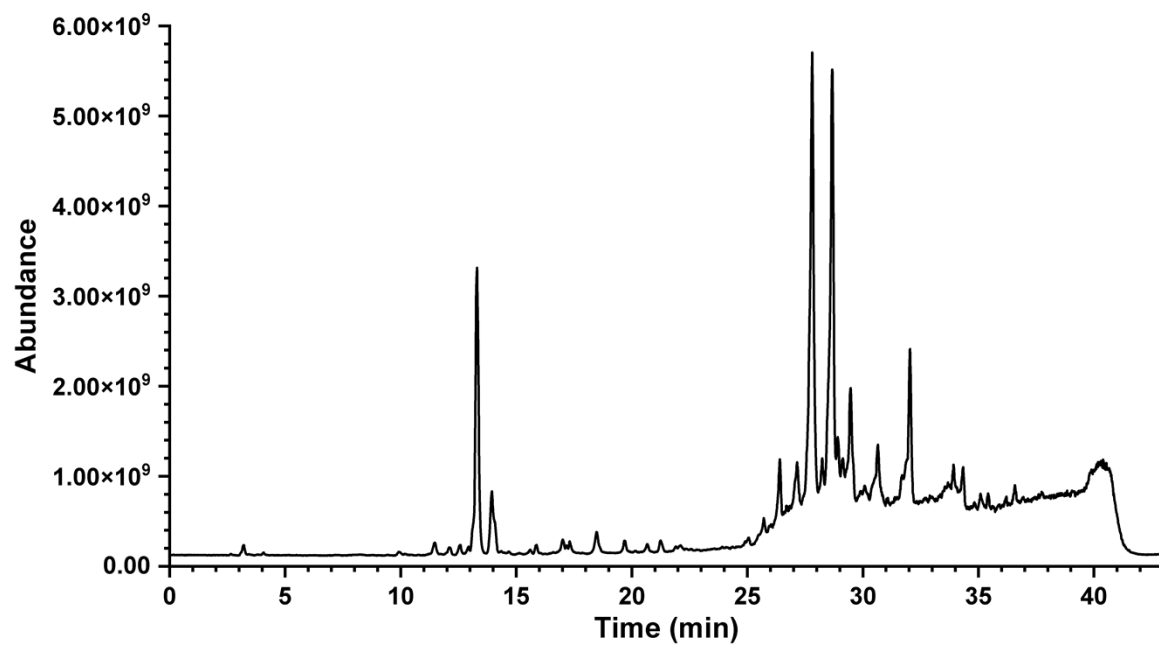

**Figure S1. Total ion chromatogram (TIC) of LAE**

# MS and MS/MS spectra of identified compounds

7.937 min Norcinnamolaurine

MS

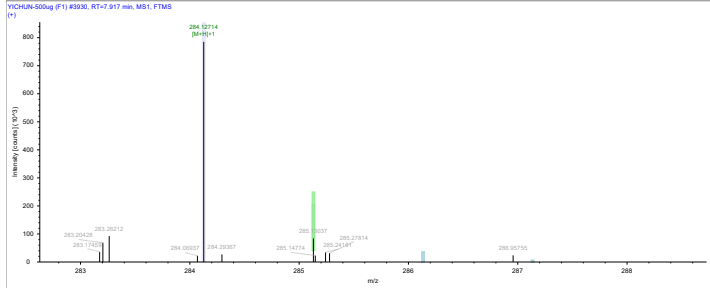

MS/MS

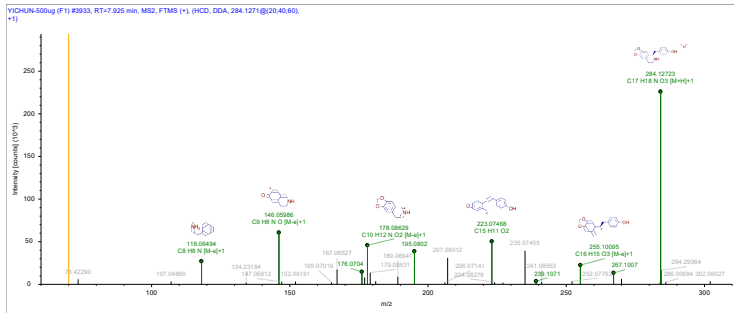

8.39 min Higenamine

MS

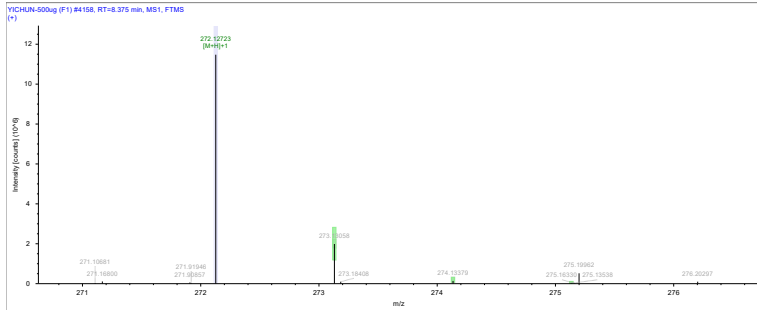

MS/MS

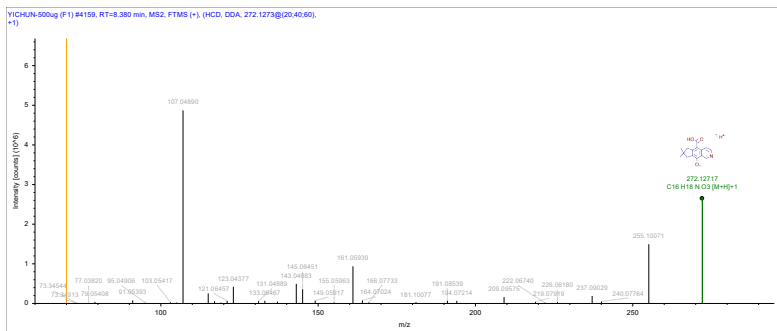

# 9.424 min Catechin

## MS

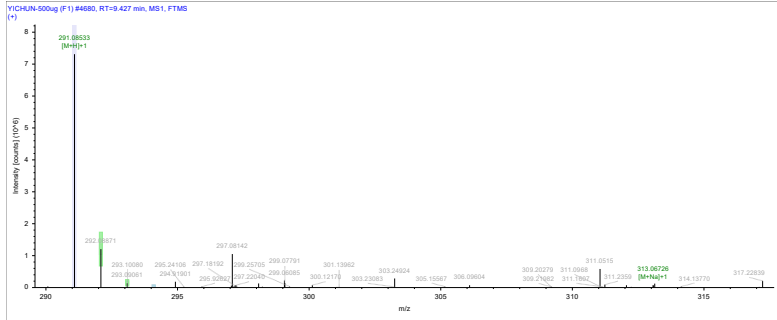

## MS/MS

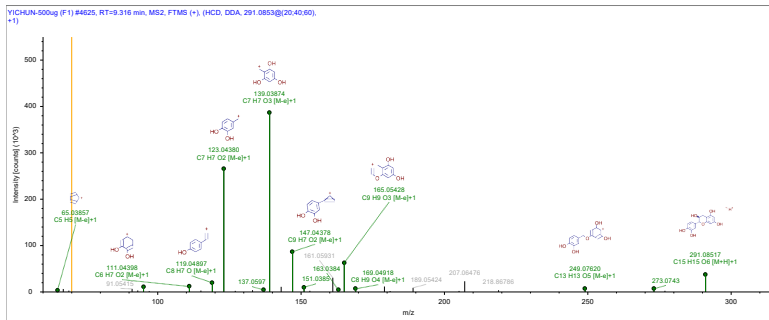

# 9.569 min Indole-3-acrylic acid

## MS

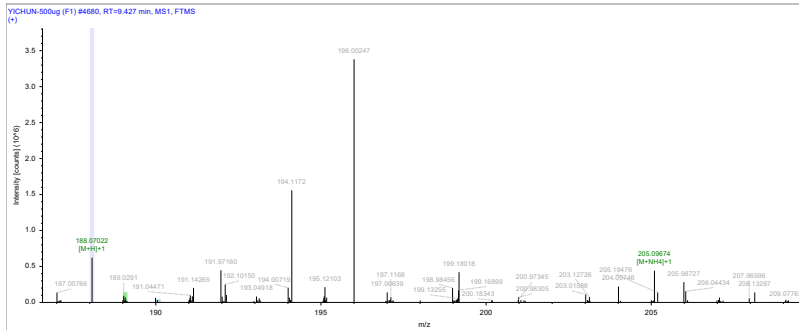

## MS/MS

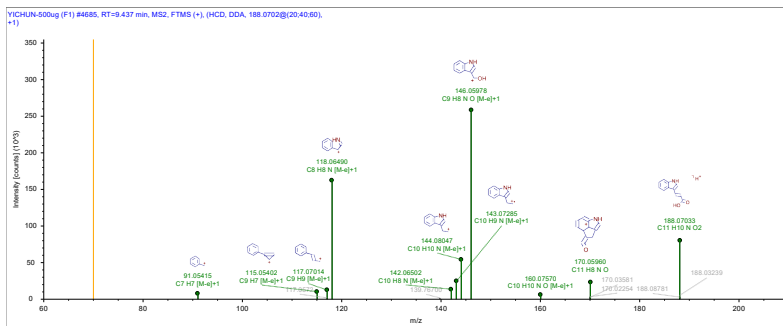

# 10.271 min Streptopyrrolidine

## MS

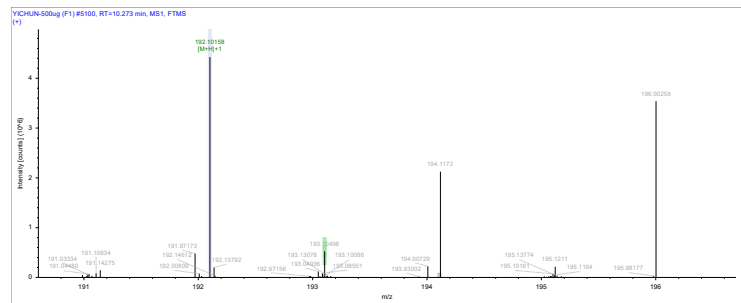

## MS/MS

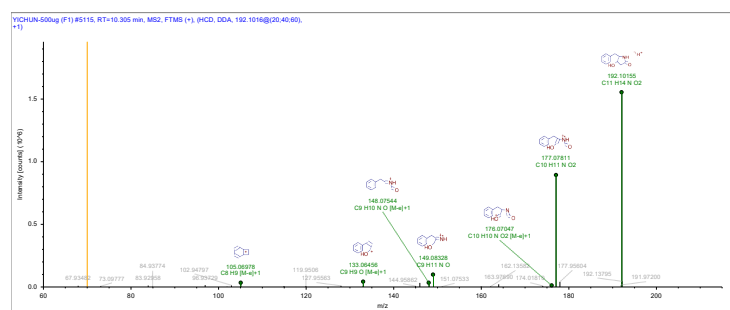

# 10.433 min Caprolactam

## MS

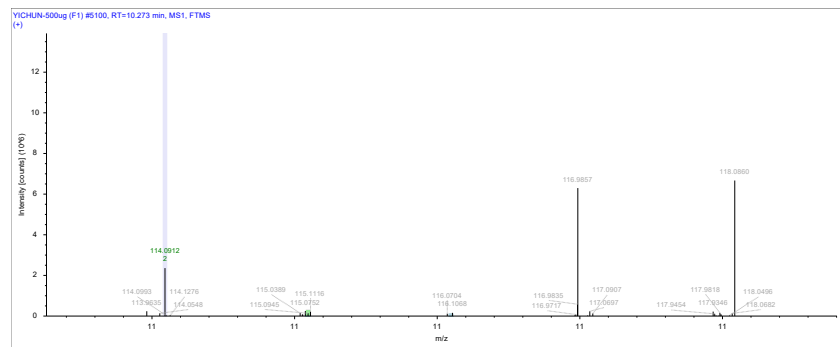

## MS/MS

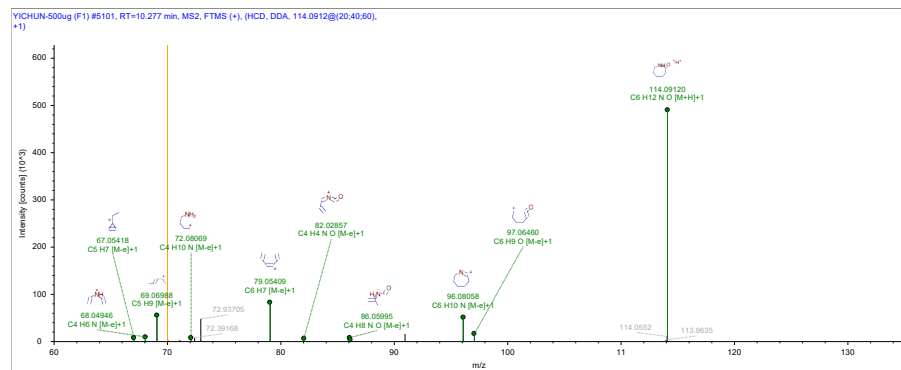

# 10.802 min Laurotetanine

## MS

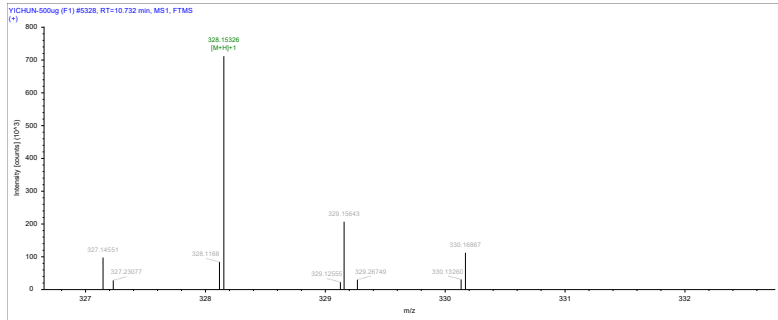

## MS/MS

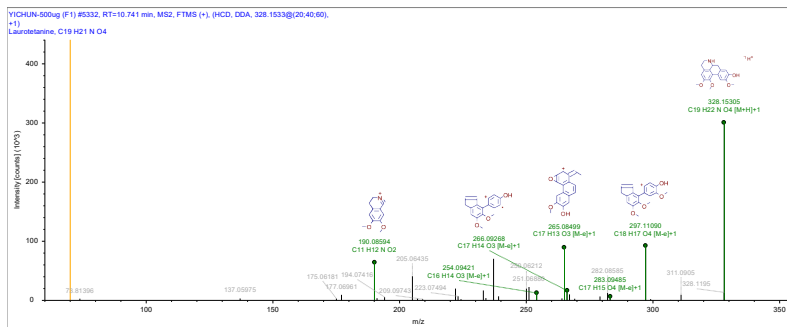

# 10.82 min Diolmycin A1

## MS

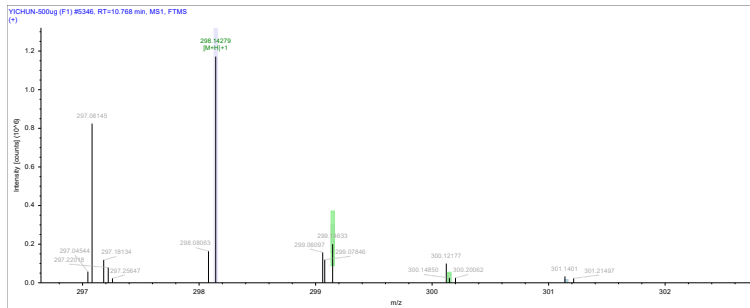

## MS/MS

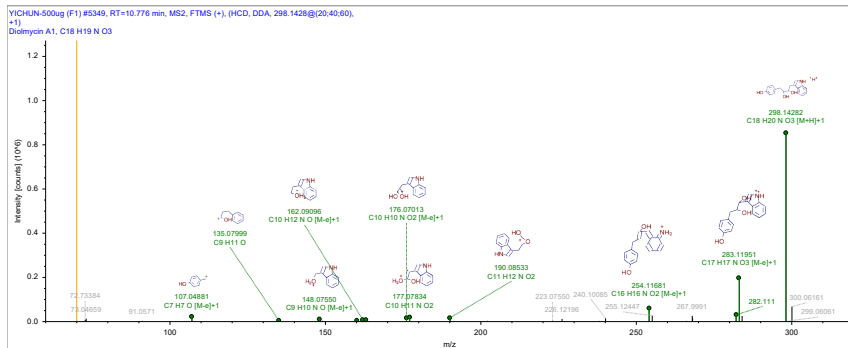

# 11.53 min Norbracteoline

## MS

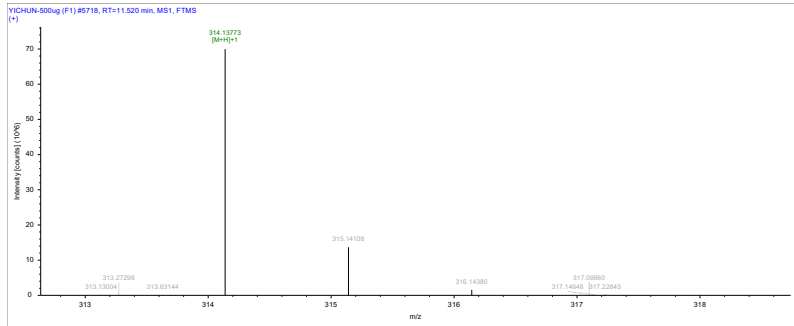

## MS/MS

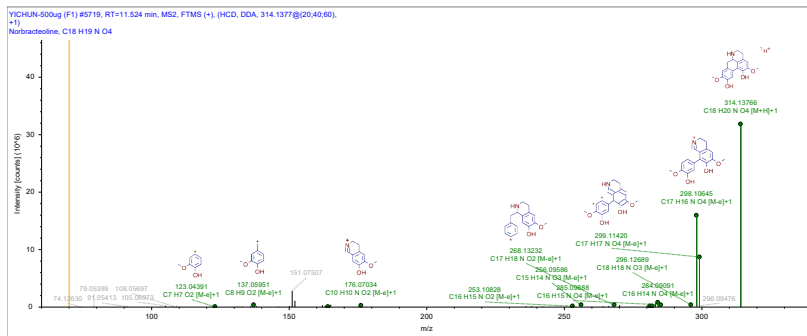

# 12.19 min Coclaurine

## MS

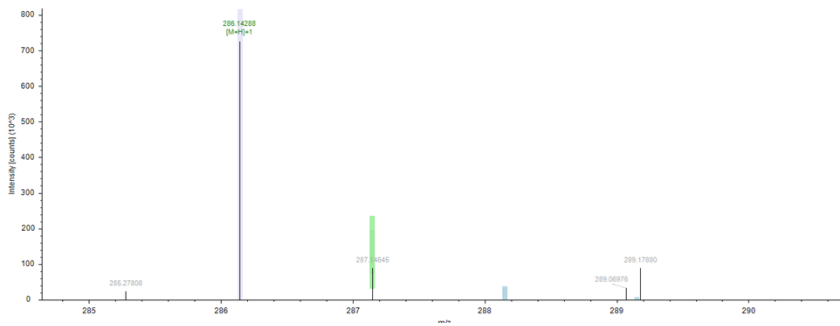

## MS/MS

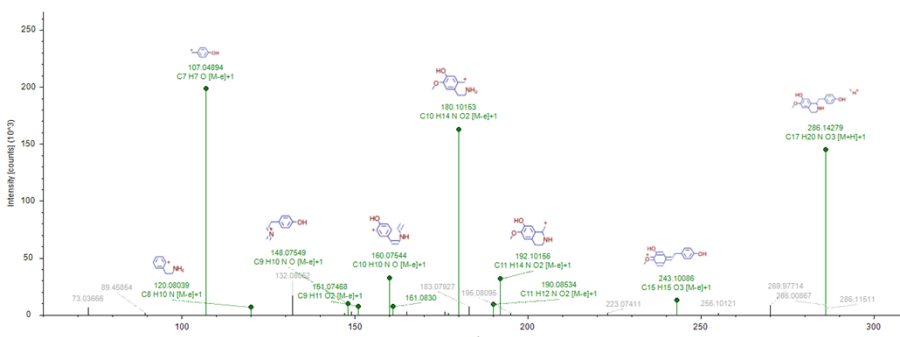

# 13.371 min Norisoboldine

## MS

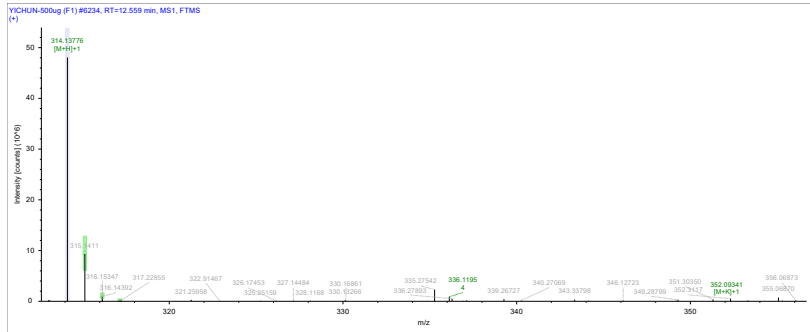

## MS/MS

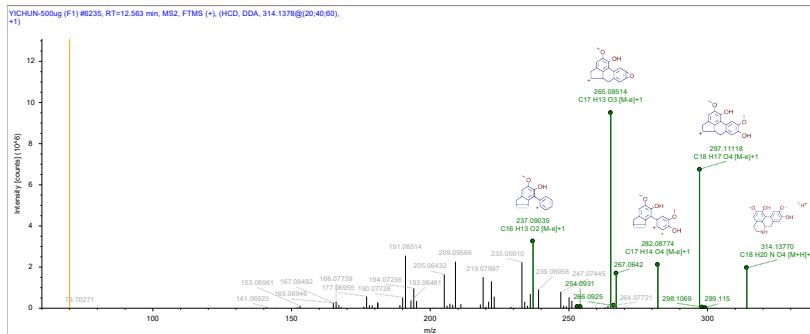

# 12.83 min Northalifoline

## MS

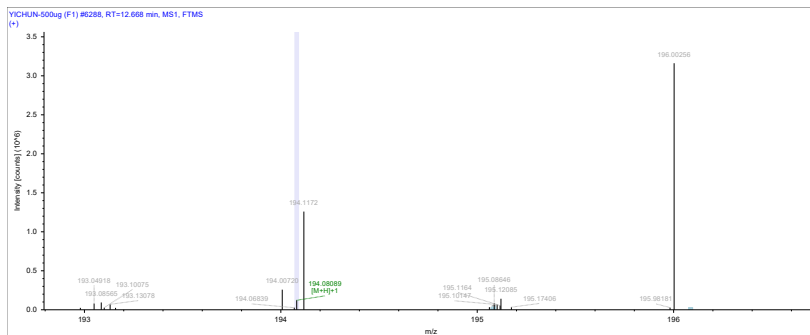

## MS/MS

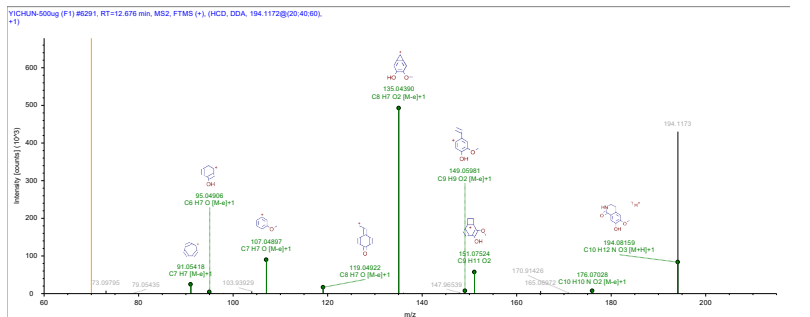



# 12.866 min 3-hydroxy-2,5-toluquinone

## MS

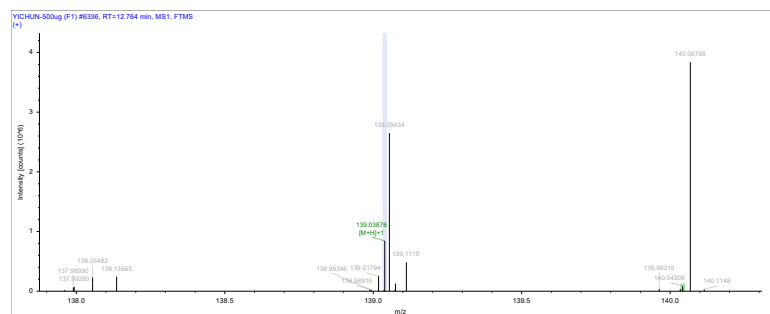

## MS/MS

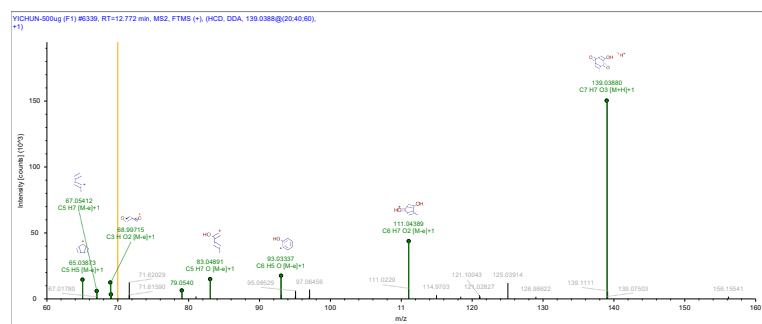

# 12.99 min N-Methylhernovine

## MS

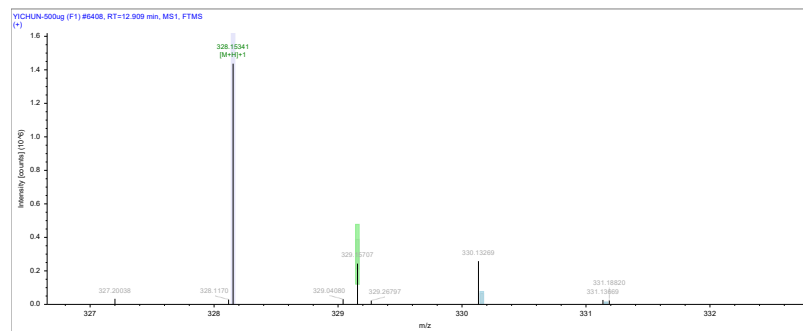

## MS/MS

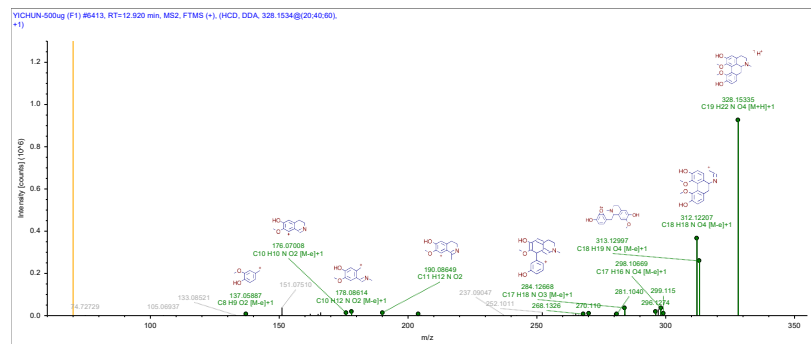

# 13.008 min Pronuciferine

## MS

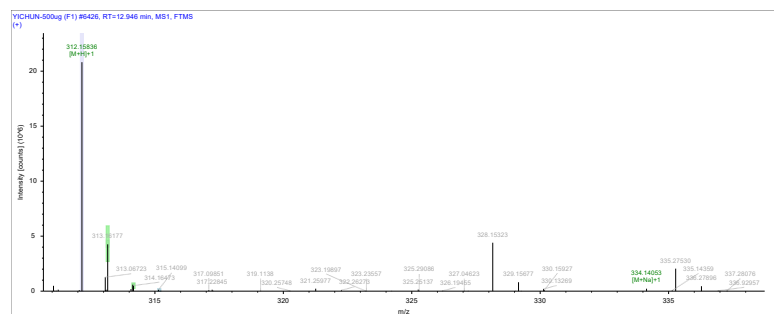

## MS/MS

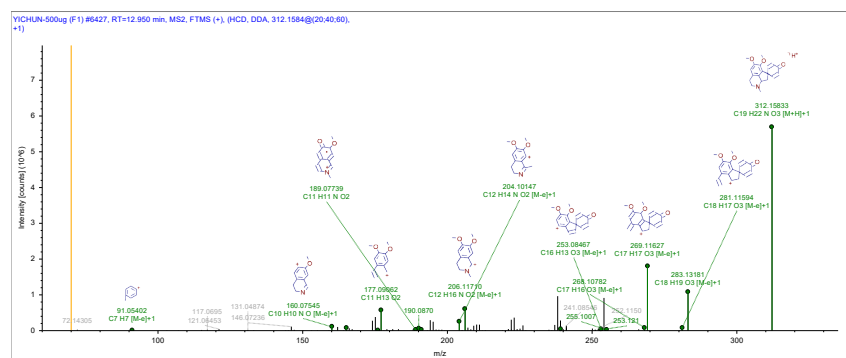

# 14 min Boldine

## MS

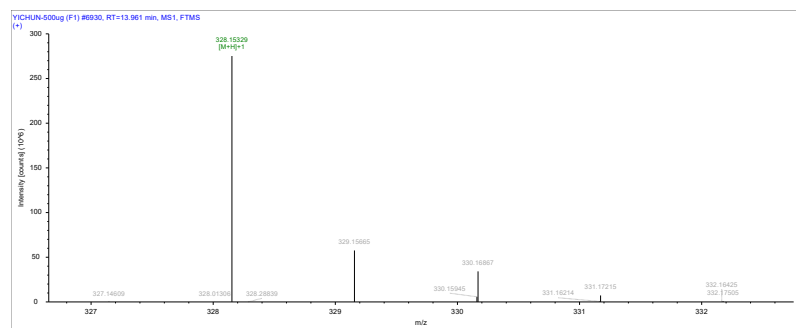

## MS/MS

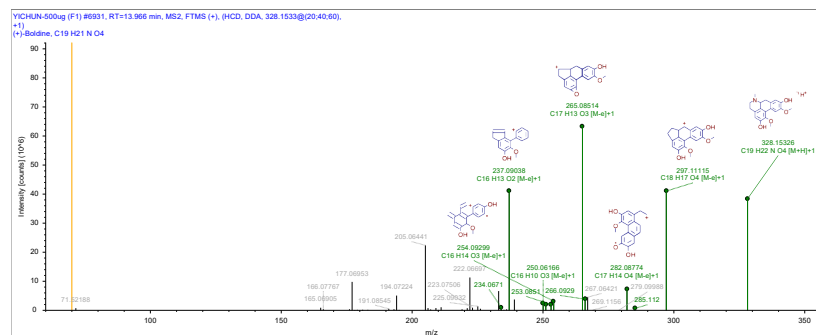

# 14.138 min Reticuline

## MS

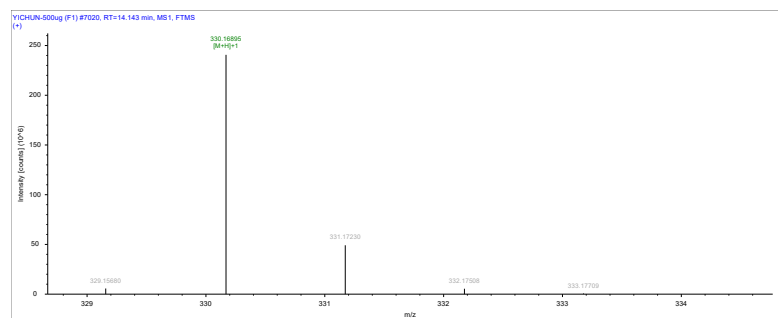

## MS/MS

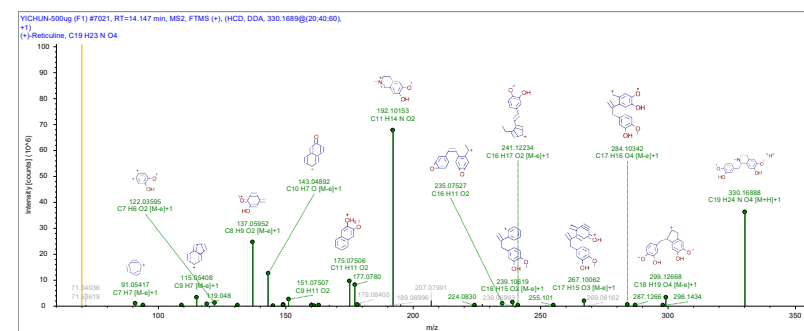

# 14.242 min Norboldine

## MS

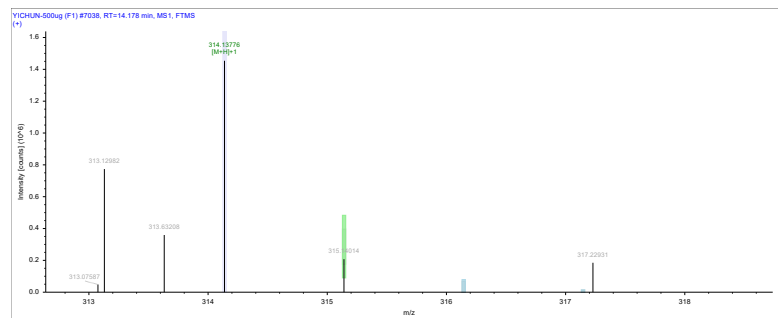

## MS/MS

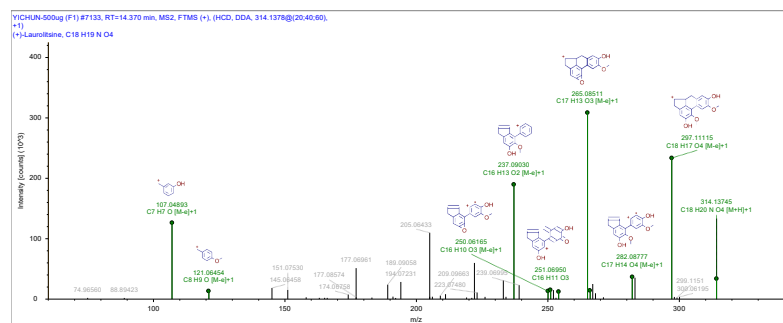

# 14.818 min 4,6,10,12-Tridecatetraene-2,8-diol

## MS

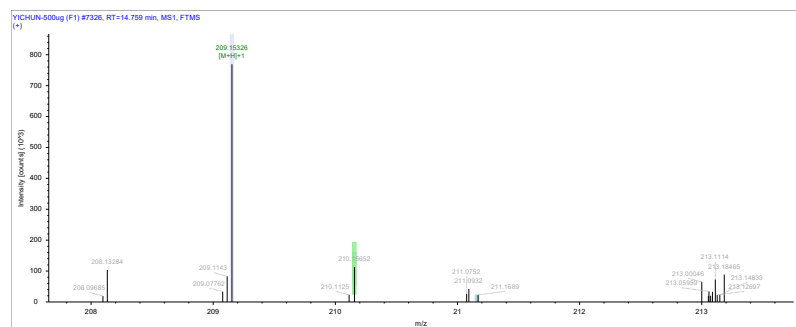

## MS/MS

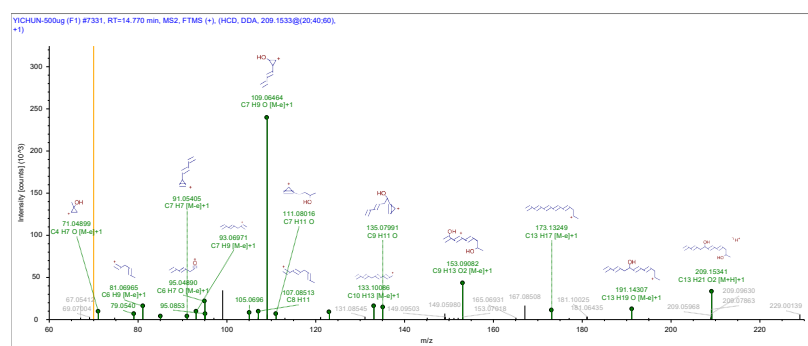

# 15.924 min Isoboldine

## MS

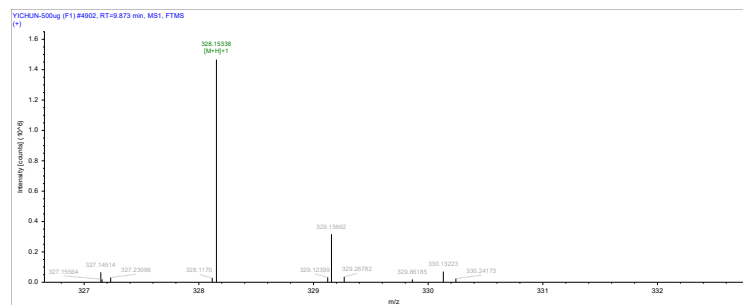

## MS/MS

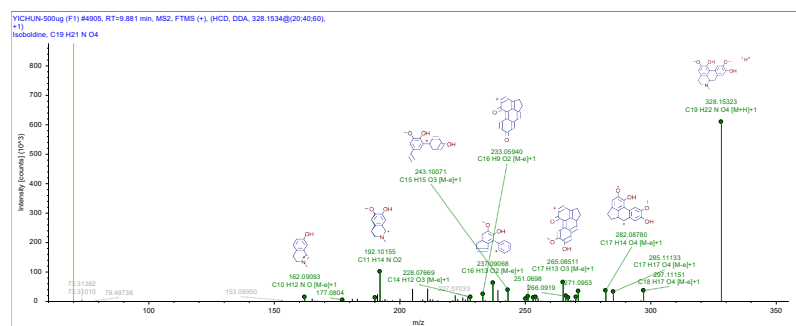

# 17.327 min 1-(5-oxotetrahydrofuran-2-yl)ethyl 2-phenylacetate

## MS

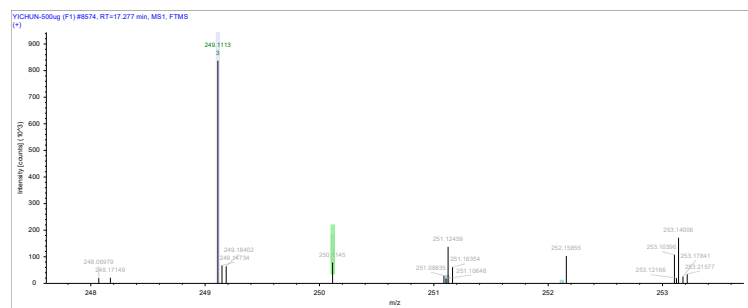

## MS/MS

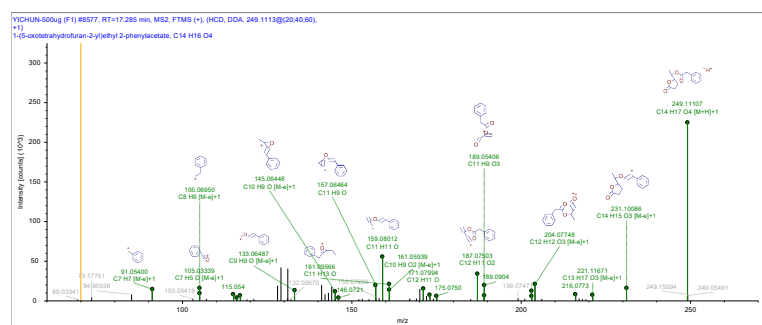

# 17.398 min Isocorydine

## MS

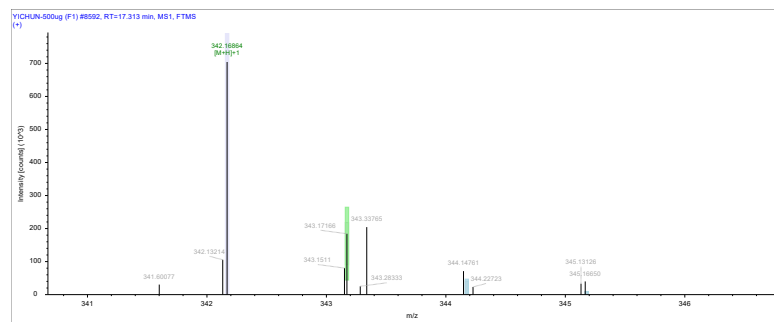

## MS/MS

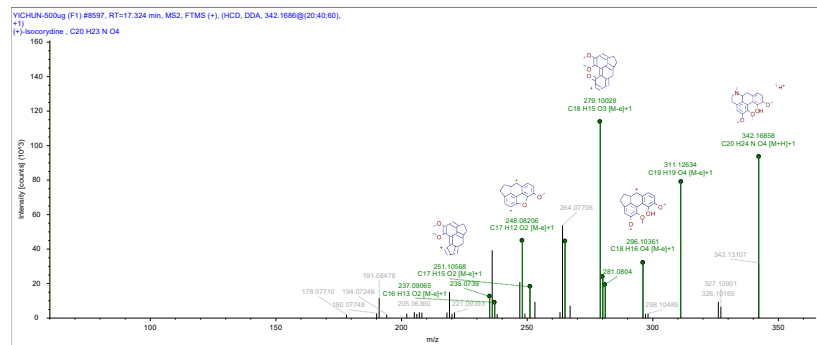

# 18.013 min Epipyrliculol

## MS

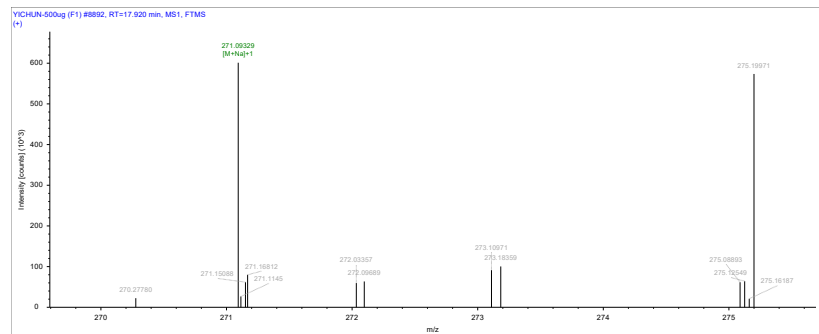

## MS/MS

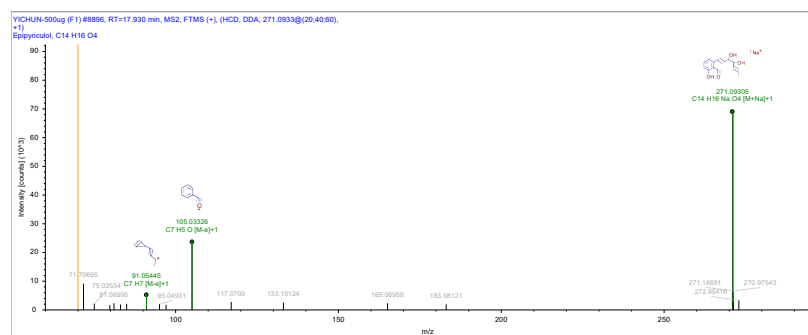

# 18.58 min N-Methyllaurotetanine

## MS

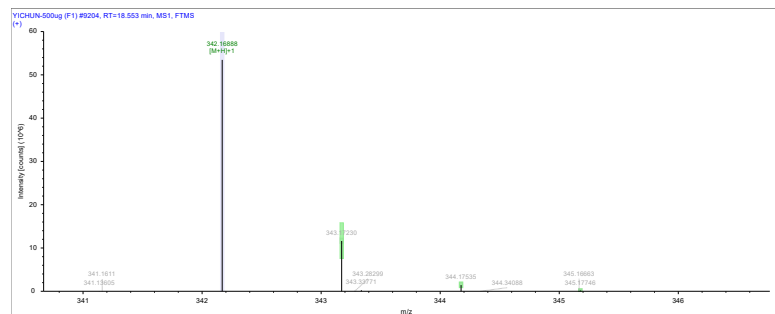

## MS/MS

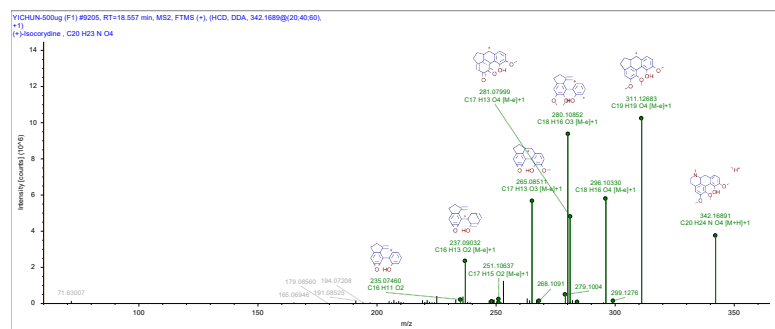

# 18.915 min Linderolide S

## MS

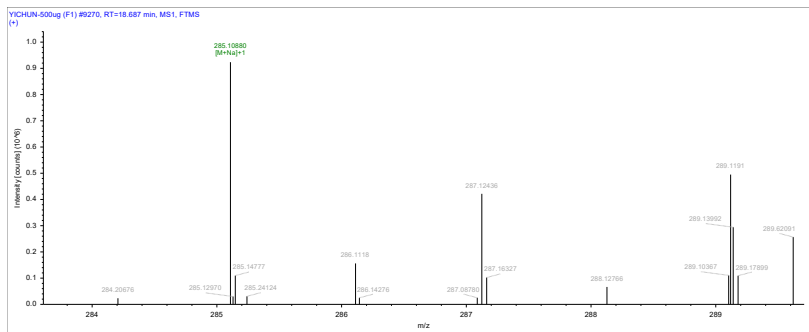

## MS/MS

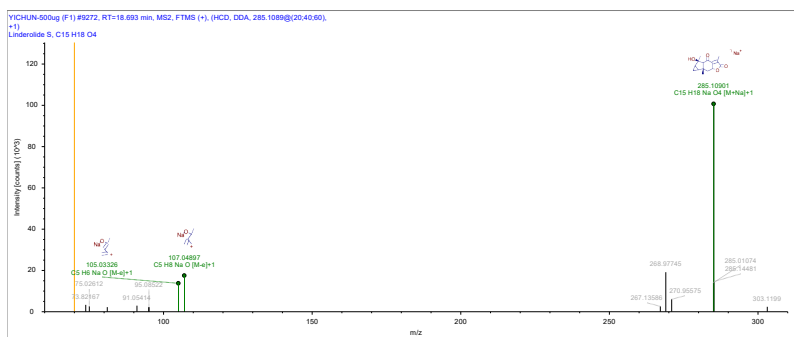

# 20.637 min 9-Hydroxy-1,2,10-trimethoxy-7H-dibenzo[de,g]quinolin-7-one

## MS

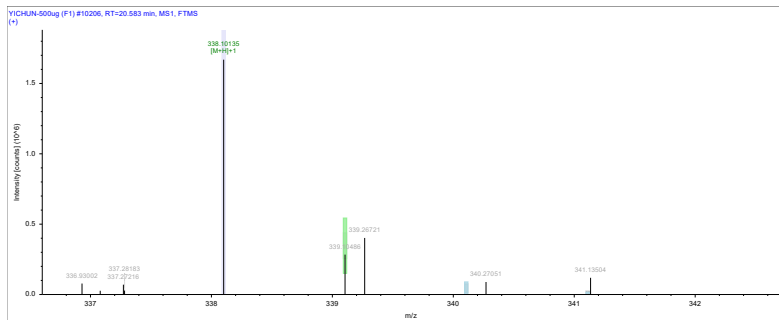

## MS/MS

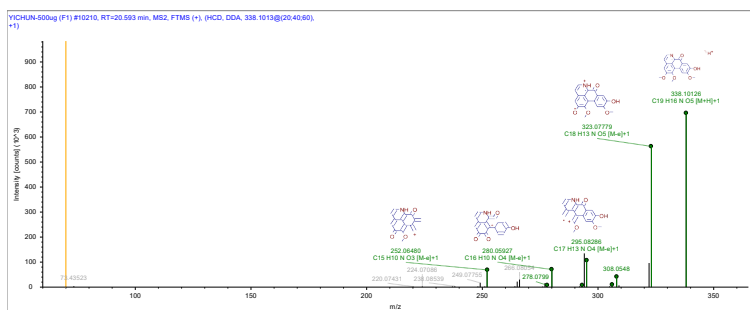

# 20.757 min Karakoramine

## MS

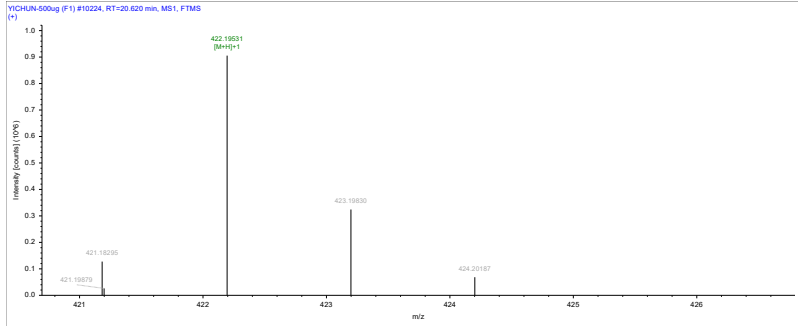

## MS/MS

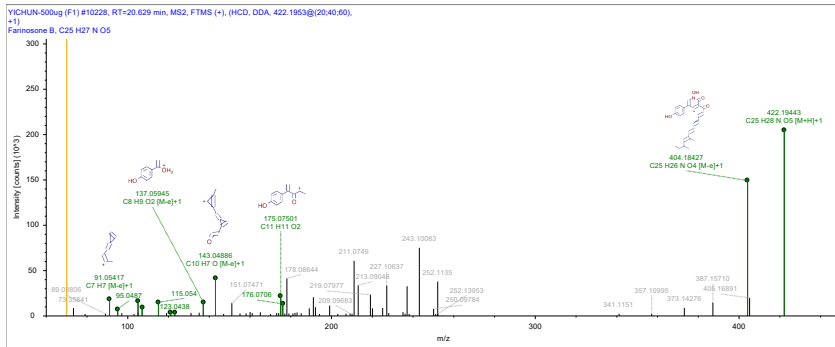

# 20.807 min Norarmepavine

## MS

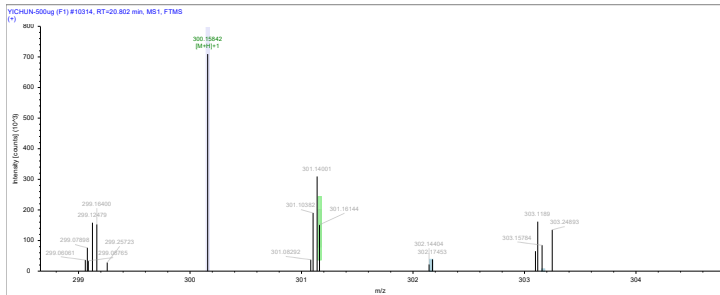

## MS/MS

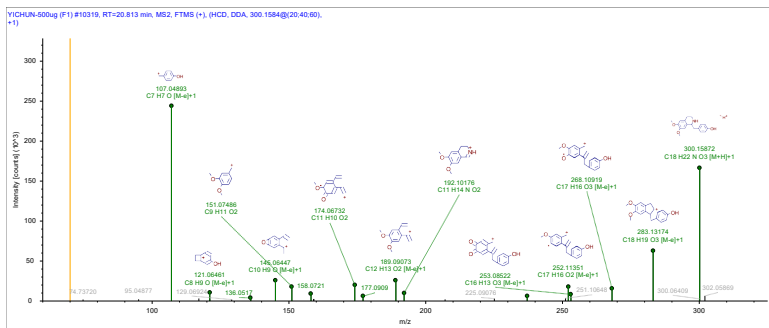



# 20.884 min Linderolide D

## MS

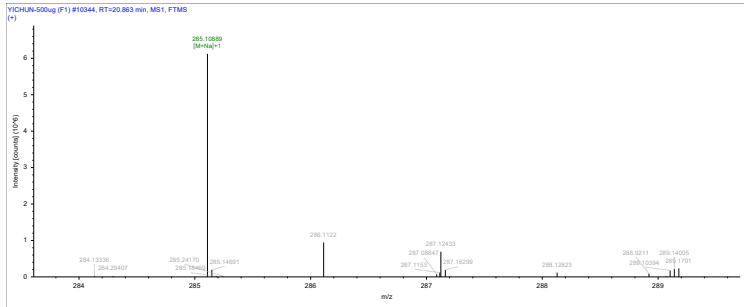

## MS/MS

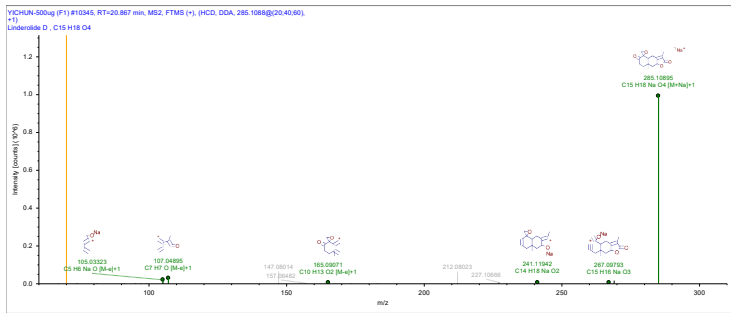

# 20.89 min Neolinderolactone

## MS

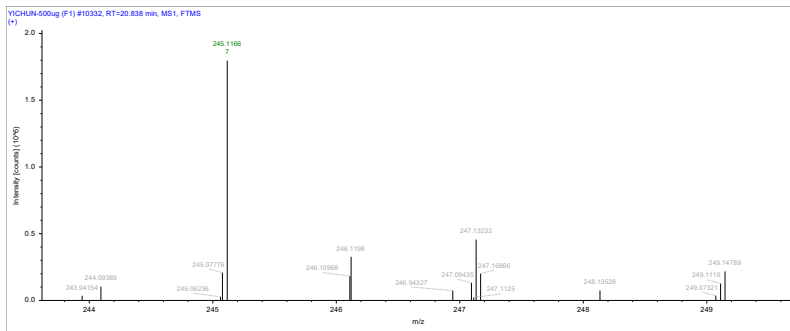

## MS/MS

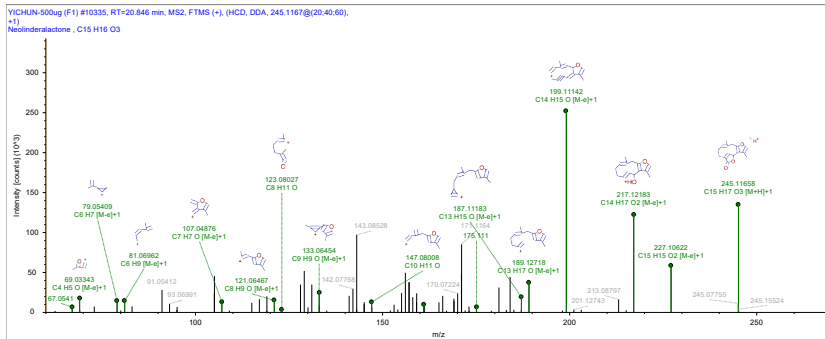

# 21.927 min *N*-Feruloyltyramine

## MS

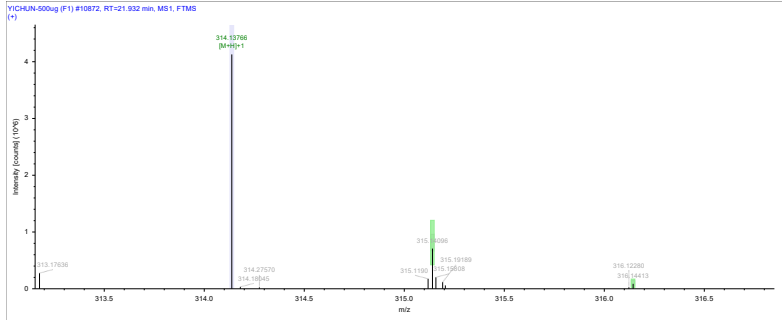

## MS/MS

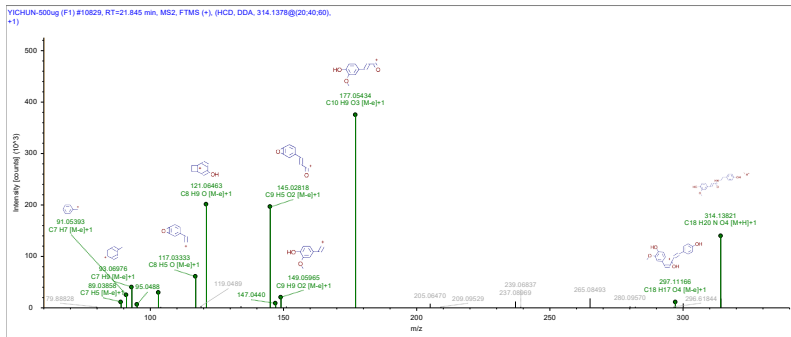

# 22.125 min Linderolide B

## MS

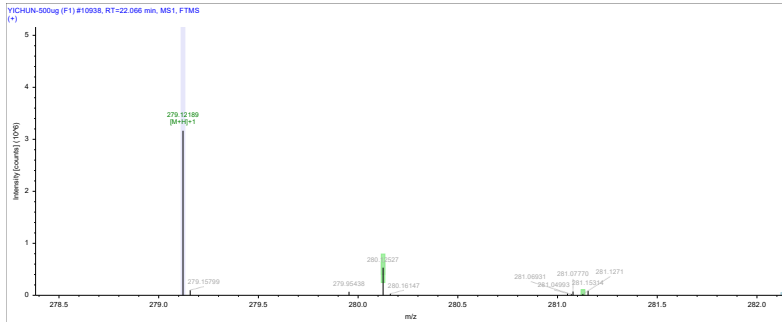

## MS/MS

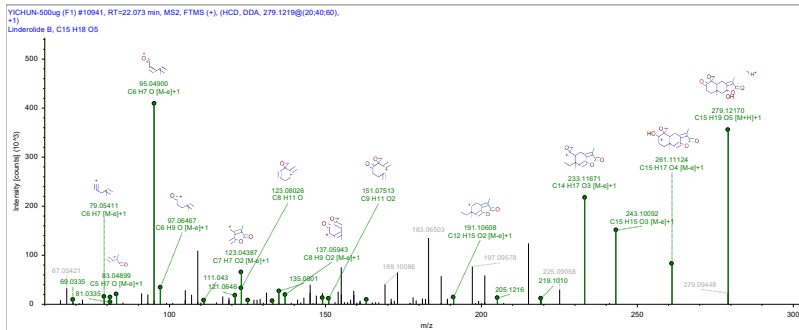

# 22.901 min Peniophoral

## MS

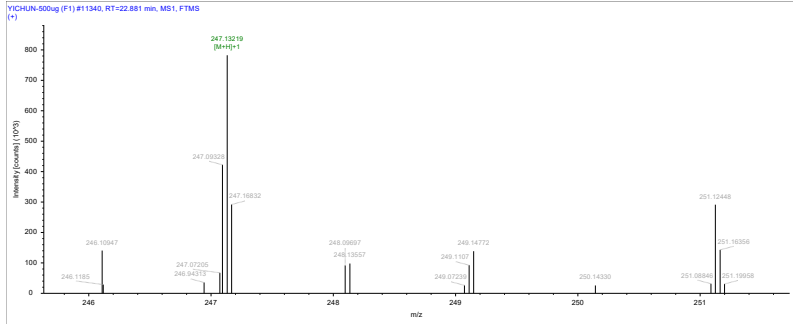

## MS/MS

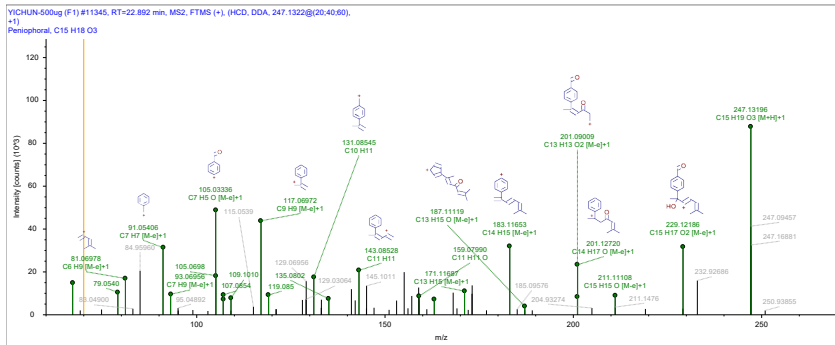

# 24.674 min 8-Hydroxyindestenolide

## MS

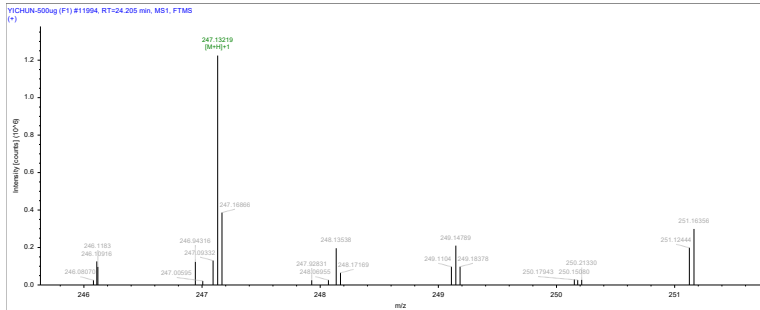

## MS/MS

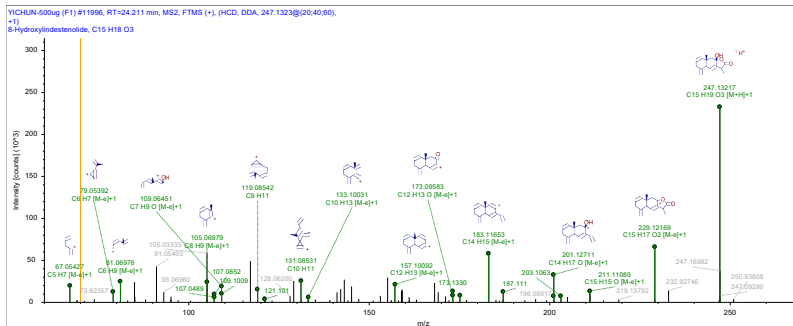

# 25.094 min Parvigemone

## MS

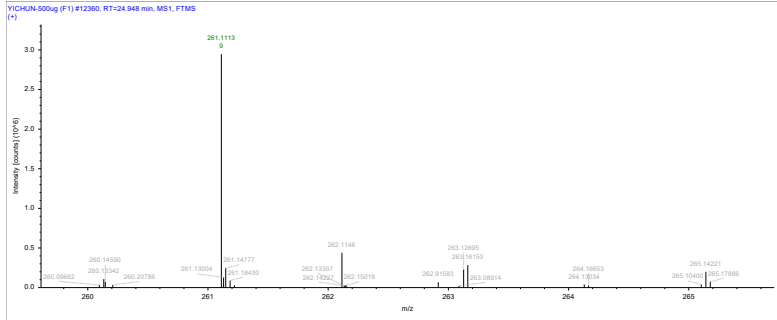

## MS/MS

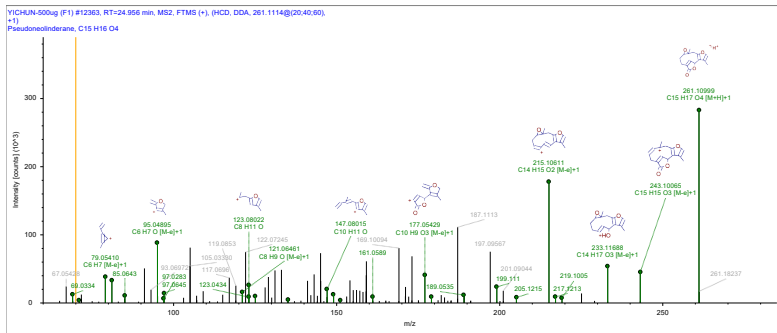

# 25.788 min Citroeviriprone B

## MS

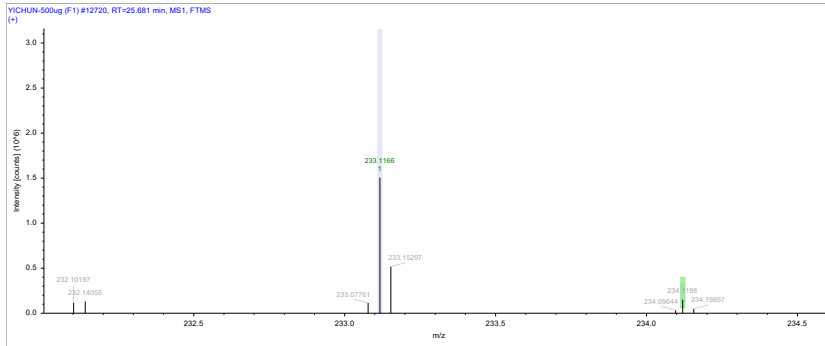

## MS/MS

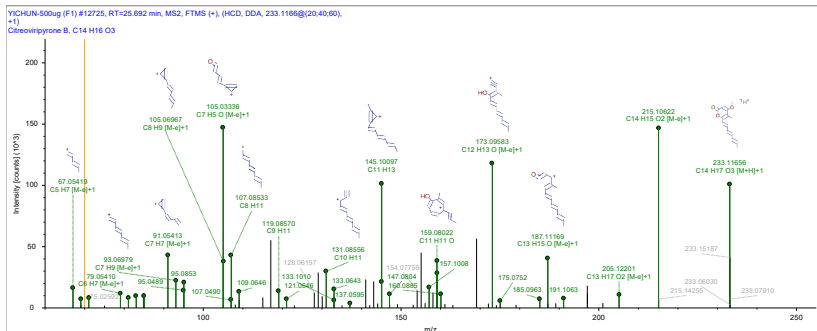

# 26.105 min Linderolide I

## MS

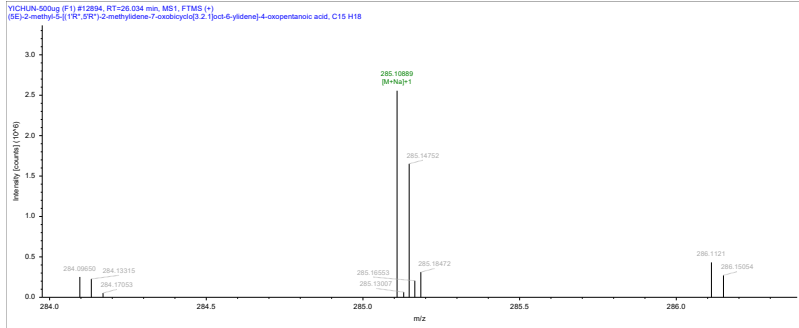

## MS/MS

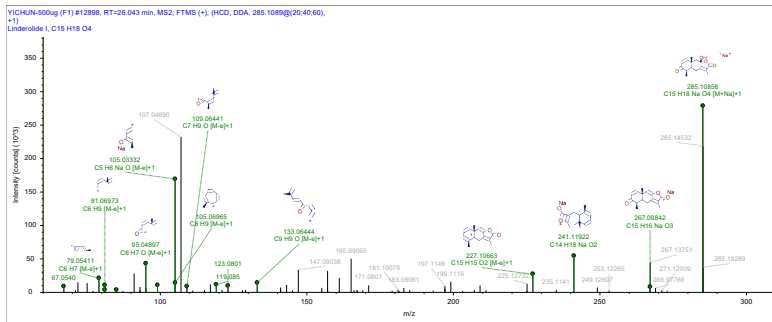

# 26.402 min 1-methylabscisic-6-acid

## MS

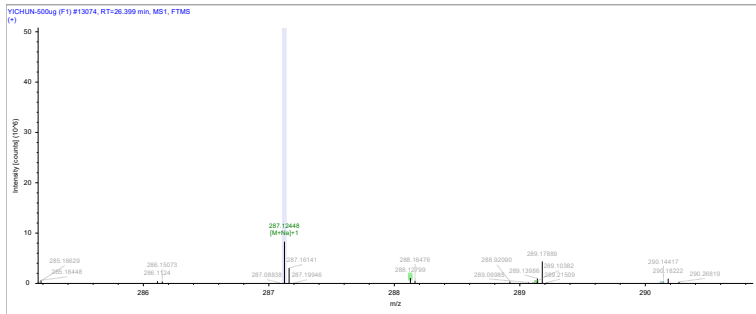

## MS/MS

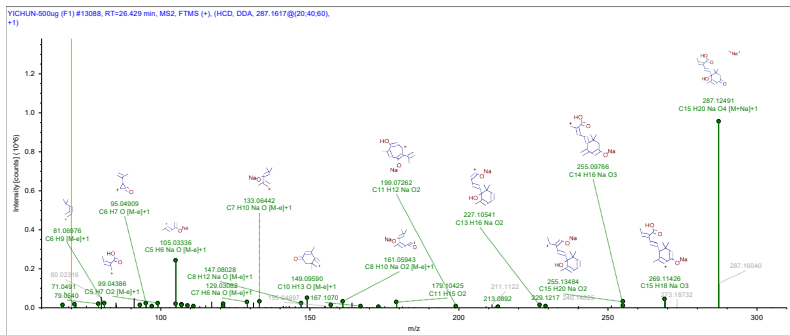

# 26.419 min 2-methyl butyl propyl phthalate

## MS

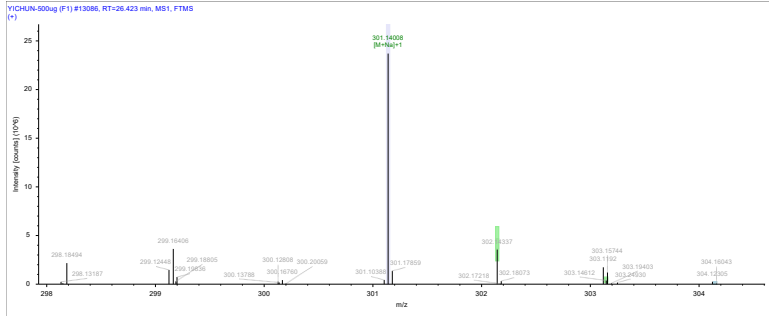

## MS/MS

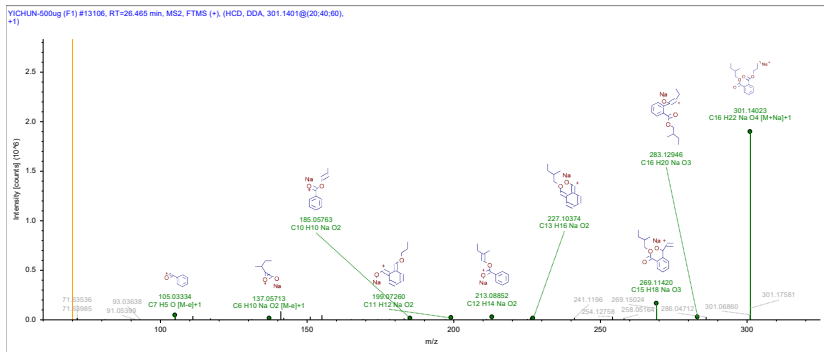

# 26.622 min β-Ionone

## MS

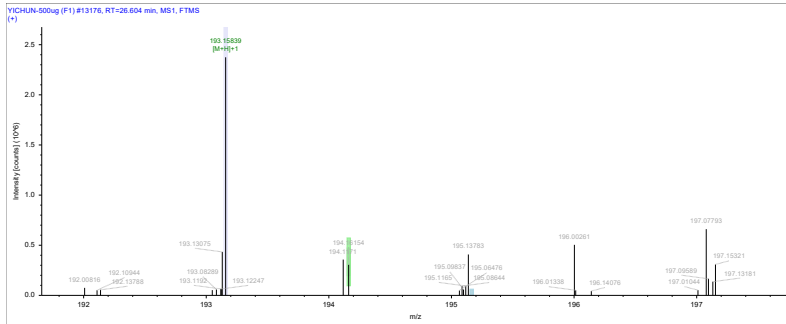

## MS/MS

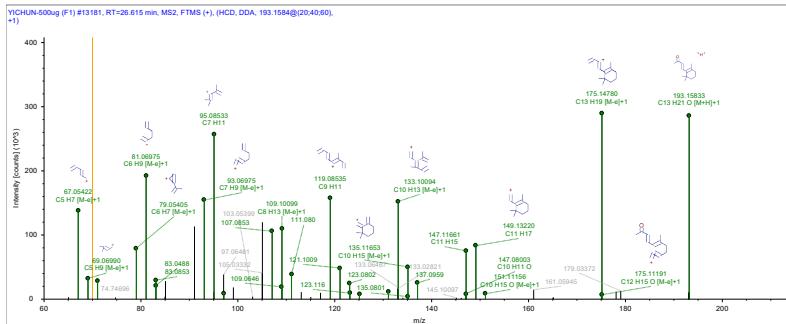

# 26.727 min Dehydrocostus lactone

## MS

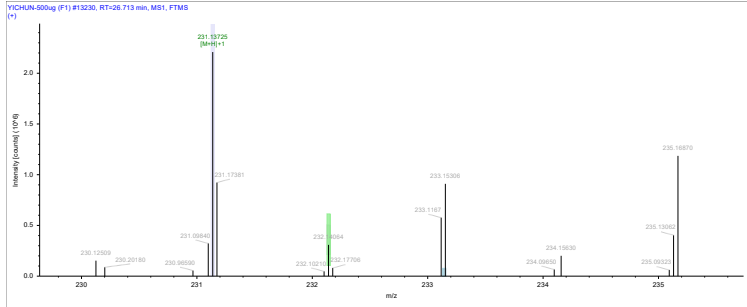

## MS/MS

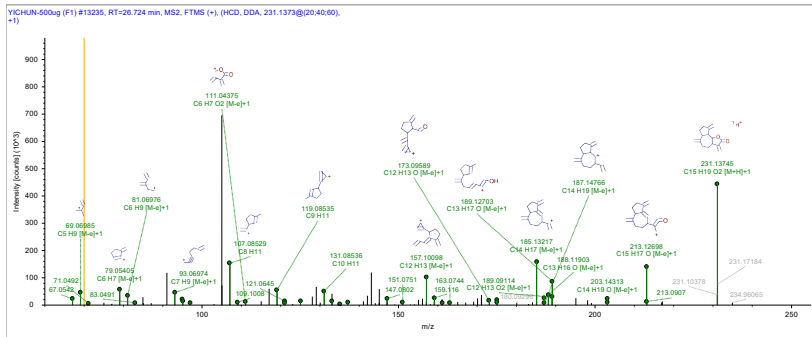

# 27.194 min Lactarioline A

## MS

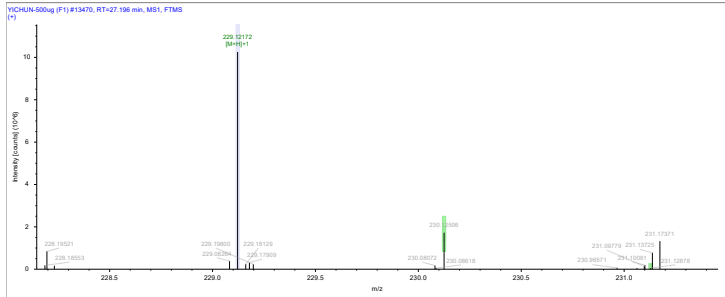

## MS/MS

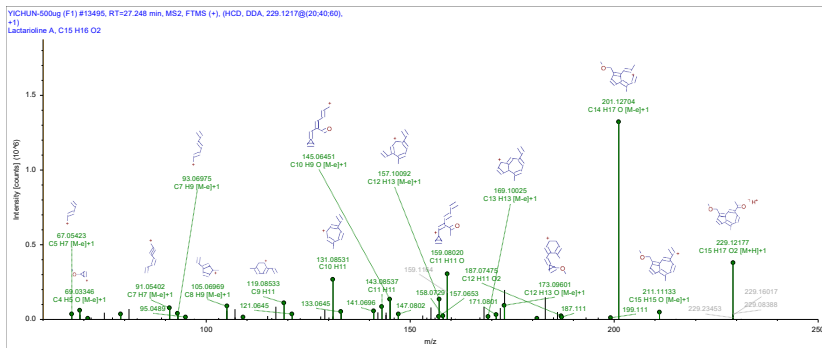

27.639 min  $\alpha$ -Farnesene

MS

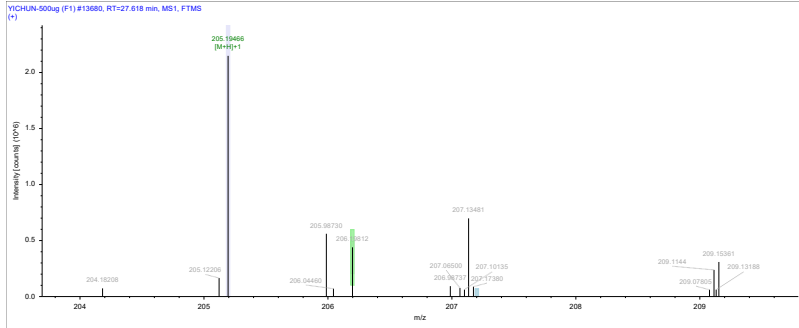

MS/MS

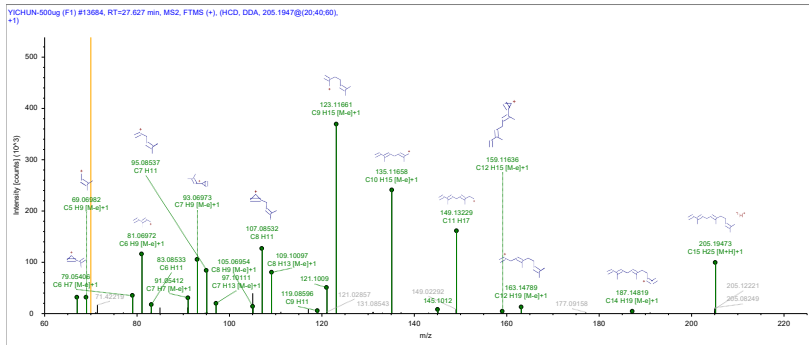

27.999 min Lindrestrenolide

MS

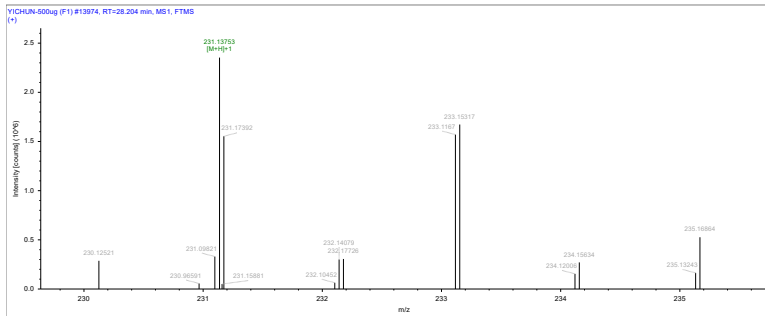

MS/MS

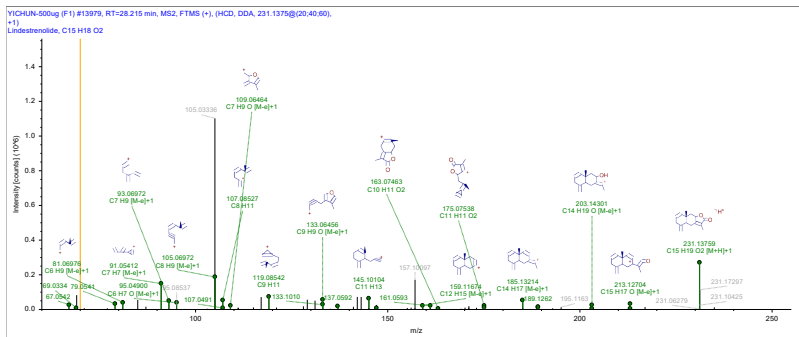



# 28.054 min Calamenene

## MS

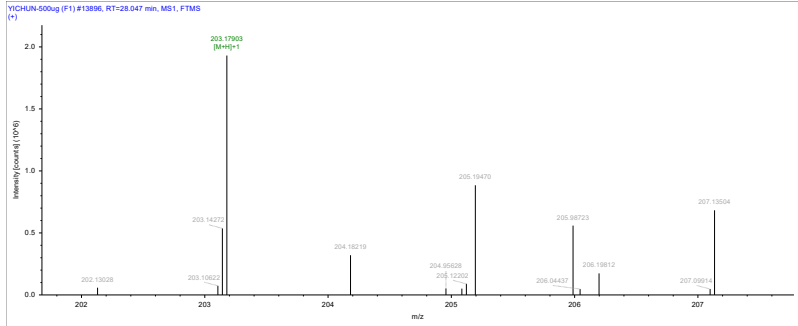

## MS/MS

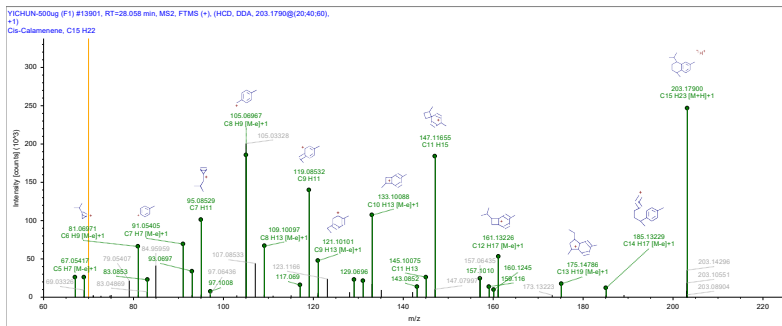

# 28.159 min 1-Phenylhept-3-en-4-one

## MS

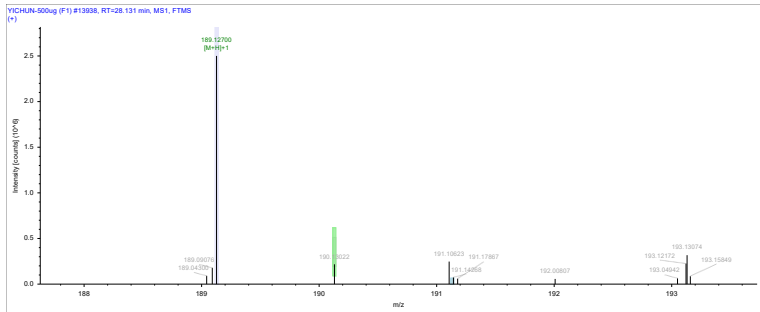

## MS/MS

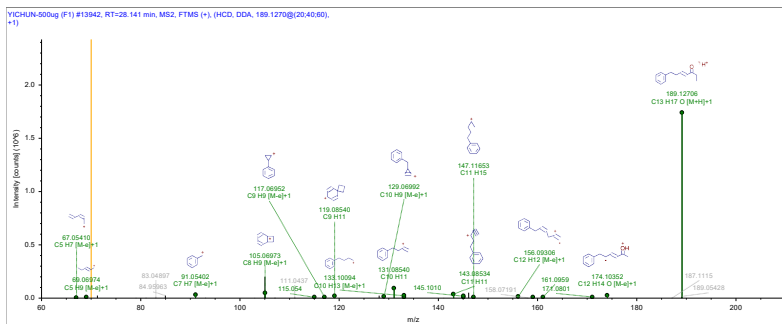

28.288 min 2,4,6,8,10,12-tetradeca-1,14-hexenedial

MS

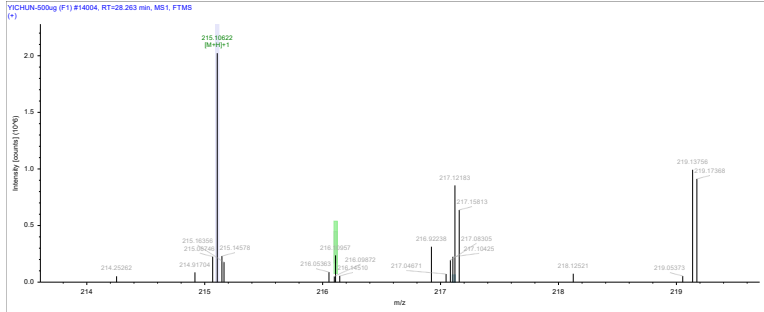

MS/MS

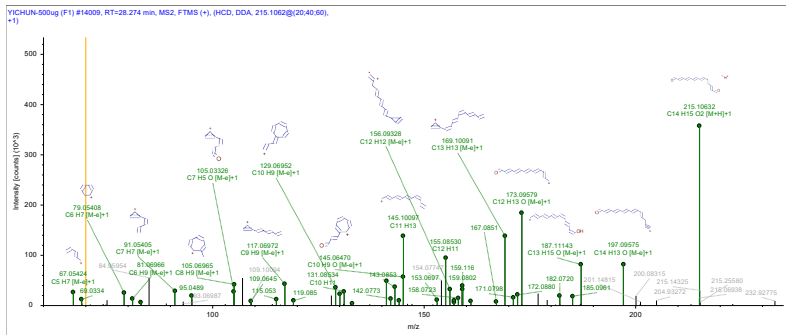

28.299 min Linderane

MS

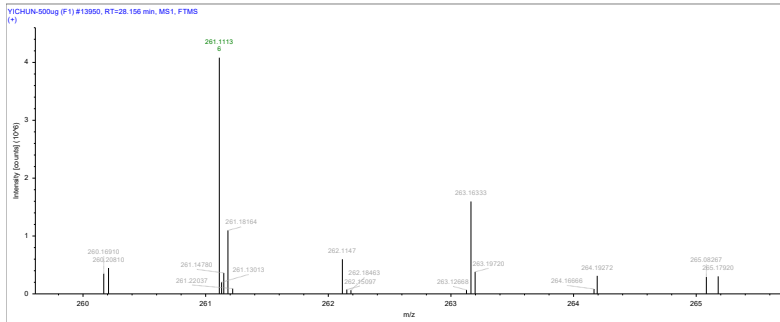

MS/MS

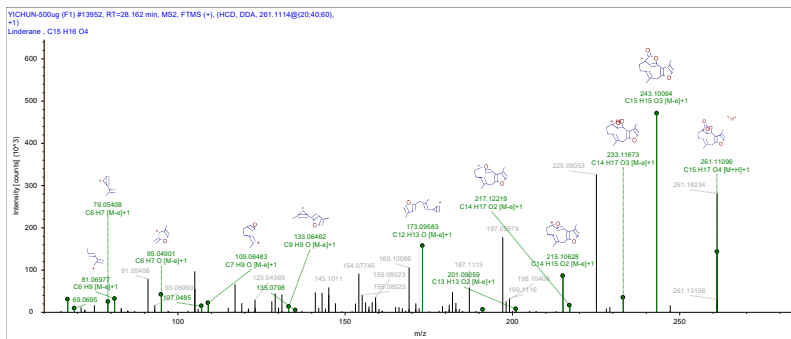

# 28.448 min 10-Methyldodec-3-en-4-olide

## MS

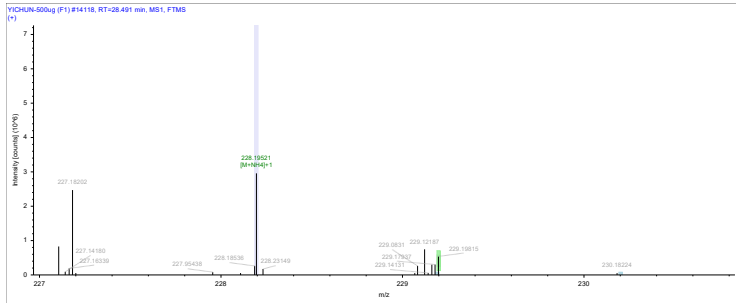

## MS/MS

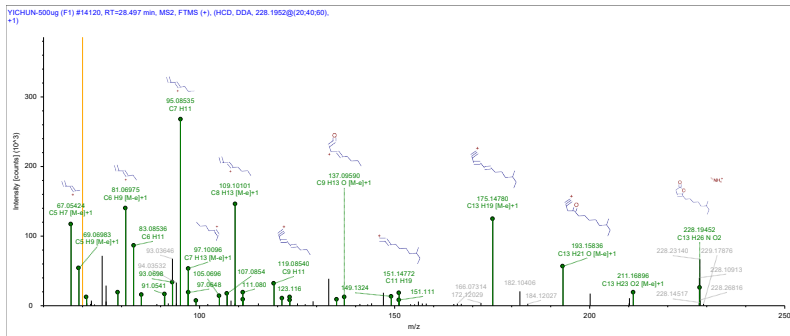

# 28.695 min Isolinderalactone

## MS

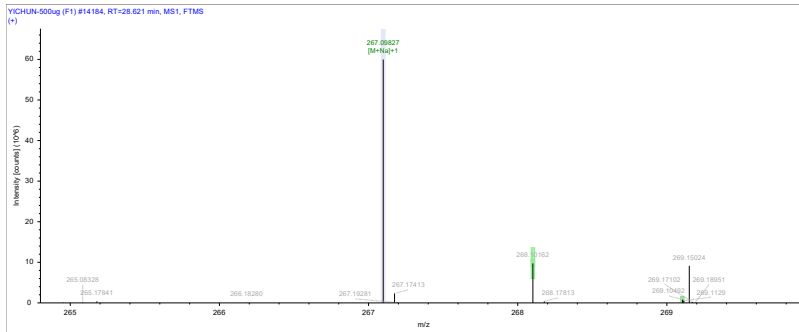

## MS/MS

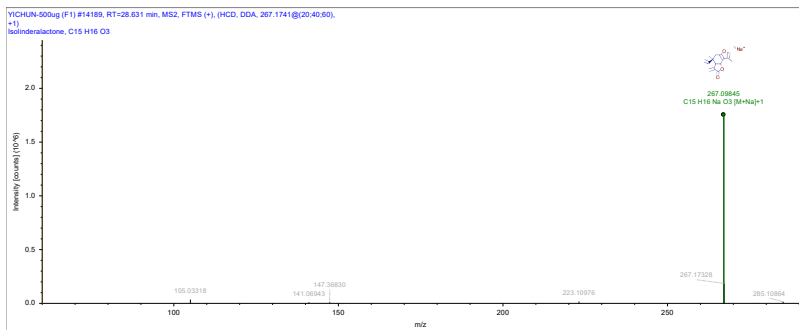

## 28.742 min Lindenol

### MS

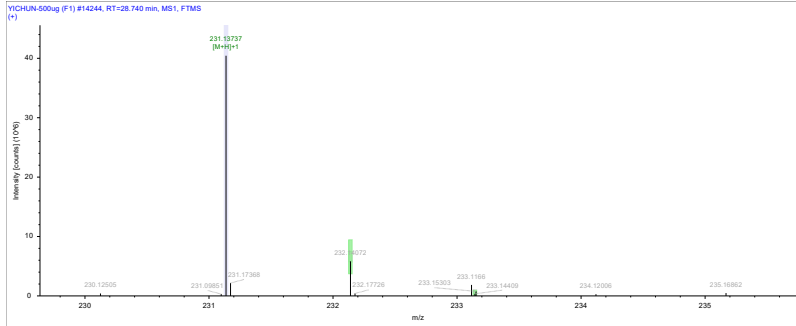

### MS/MS

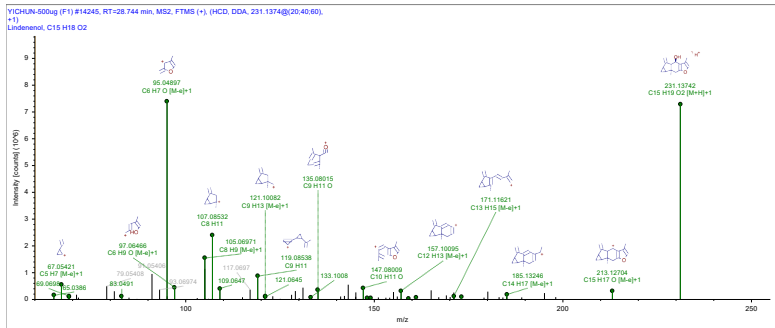

## 28.74 min Linderoxide

### MS

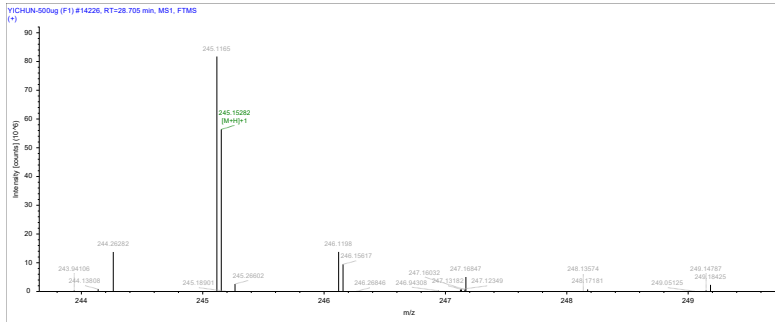

### MS/MS

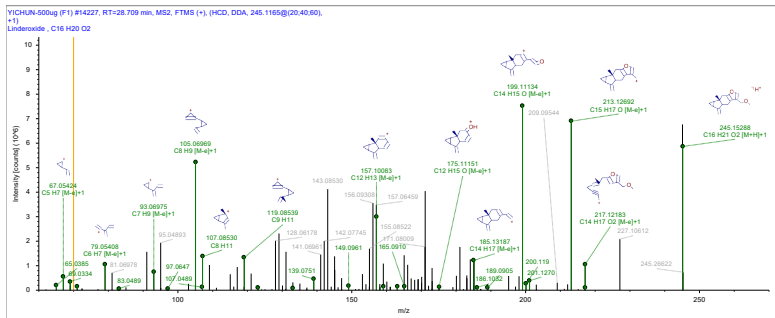

# 28.764 min Benquone

## MS

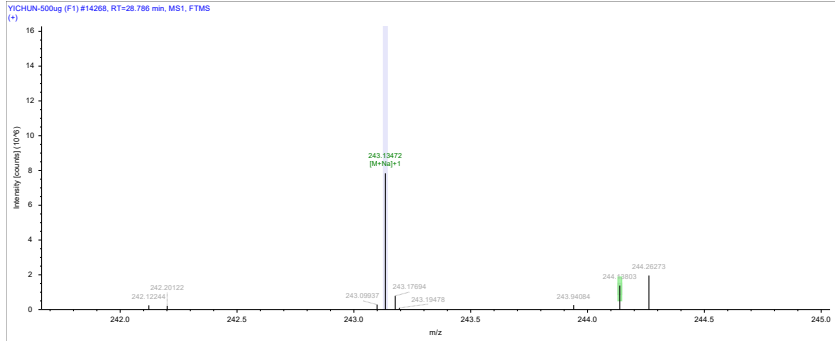

## MS/MS

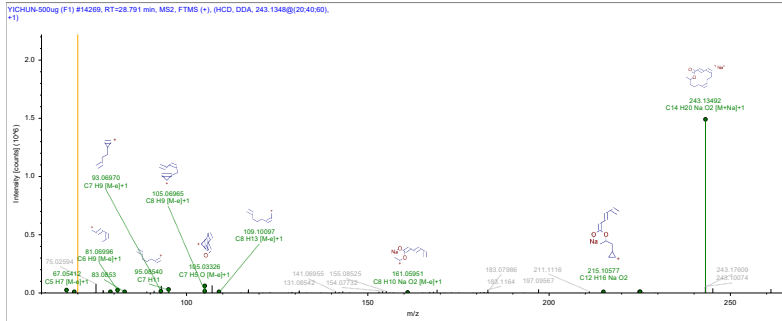

# 28.807min Anaephene A

## MS

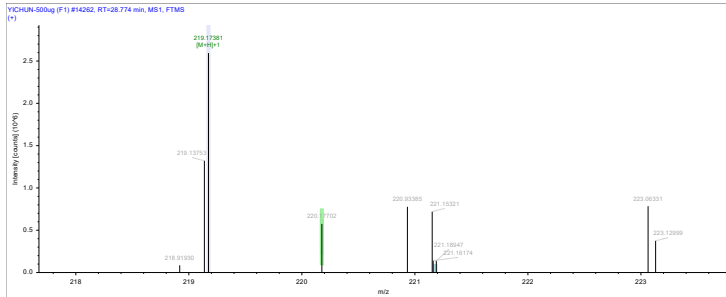

## MS/MS

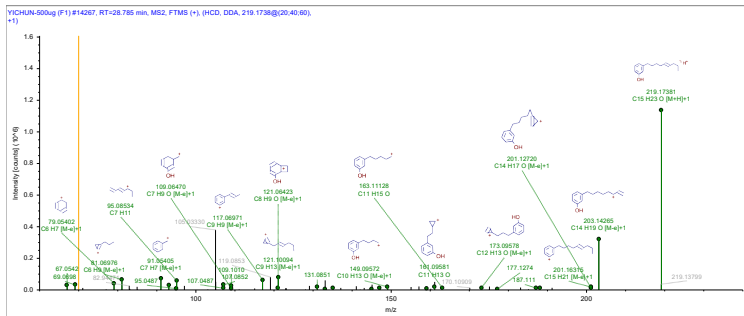

# 28.957 min Dehydrolindestrenolide

## MS

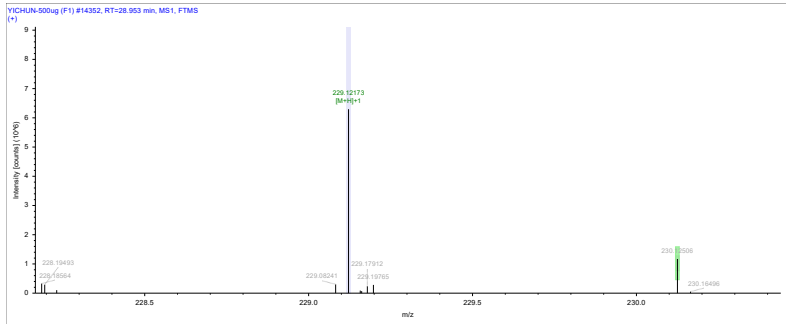

## MS/MS

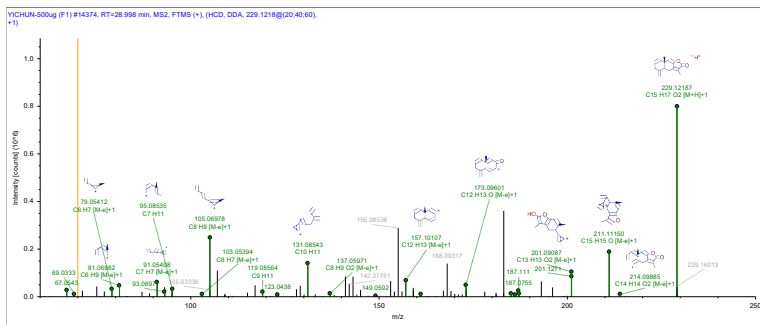

# 29.195 min Lindenanolide A

## MS

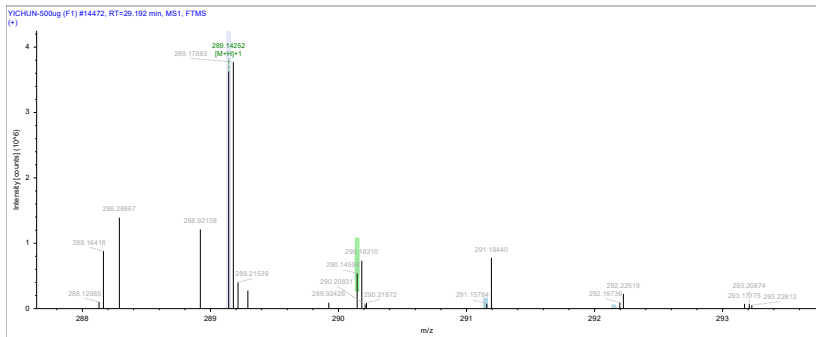

## MS/MS

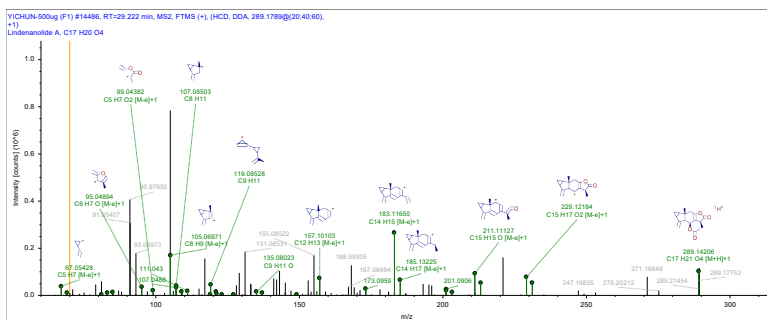

# 29.58 min Nigriterpene E

## MS

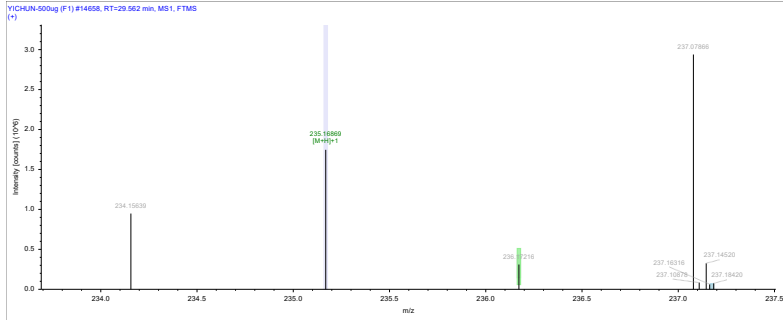

## MS/MS

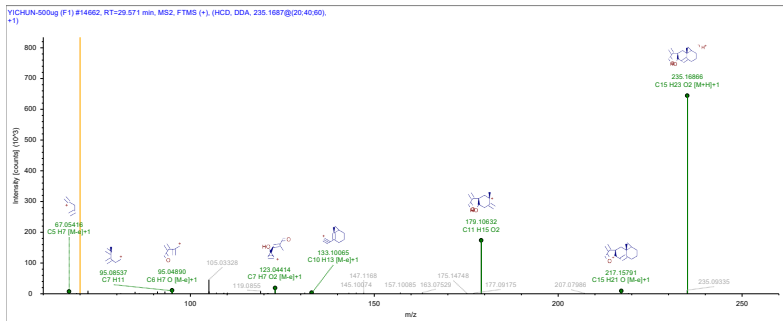

# 30.521 min Shizukanolide A

## MS

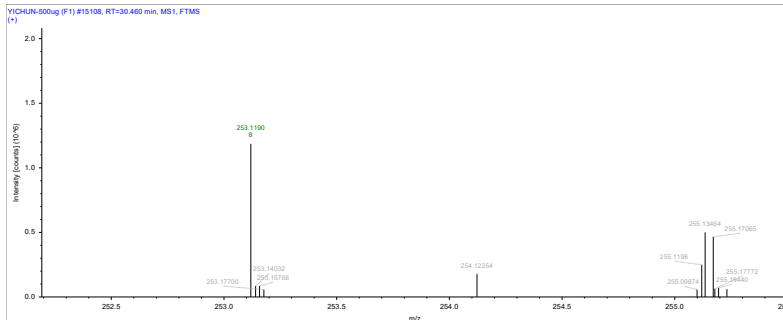

## MS/MS

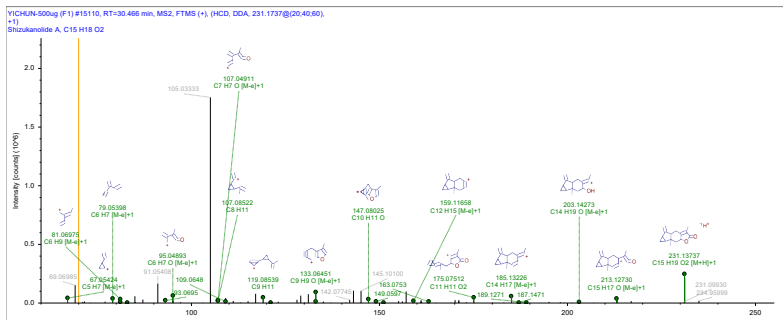

# 30.57 min Rulepidadiene B

## MS

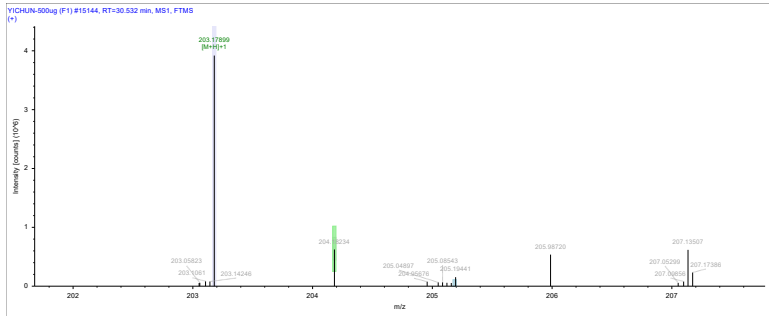

## MS/MS

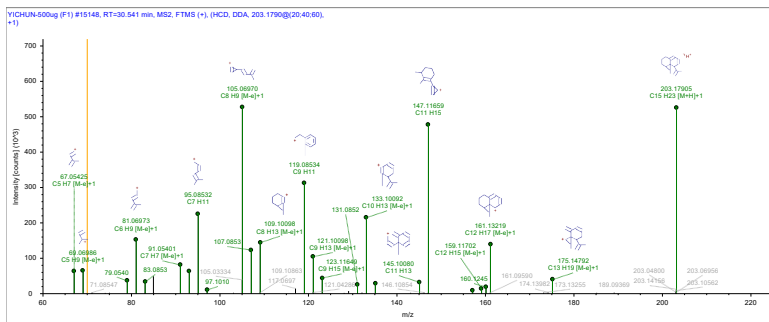

# 33.03 min Linderone

## MS

Mix-Tie-6kinds-5ul #7950 RT: 33.04 AV: 1 NL: 1.72E9  
T: FTMS + p ESI Full ms [100.0000-1000.0000]

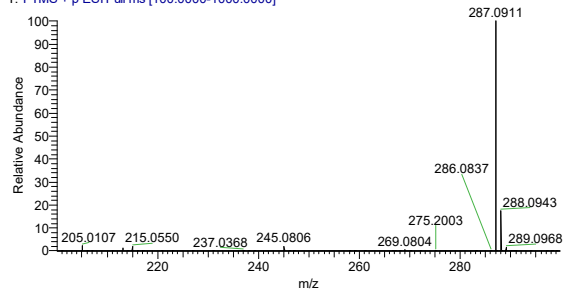

## MS/MS

Mix-Tie-6kinds-5ul #7935 RT: 32.98 AV: 1 NL: 4.80E8  
F: FTMS + p ESI d Full ms2 287.0918@hcd12.00 [50.0000-310.0000]

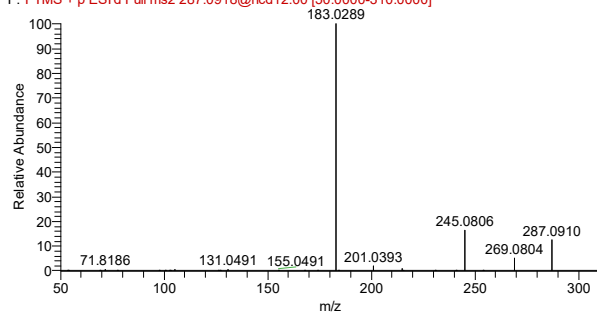



# 31.272 min Lorneic acid J

## MS

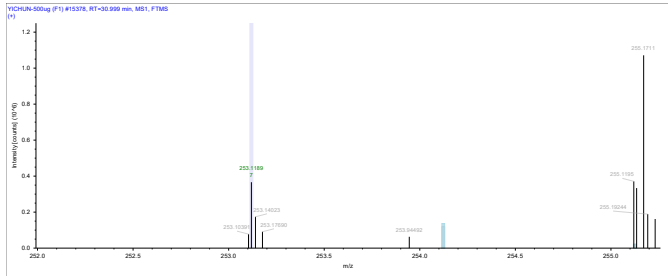

## MS/MS

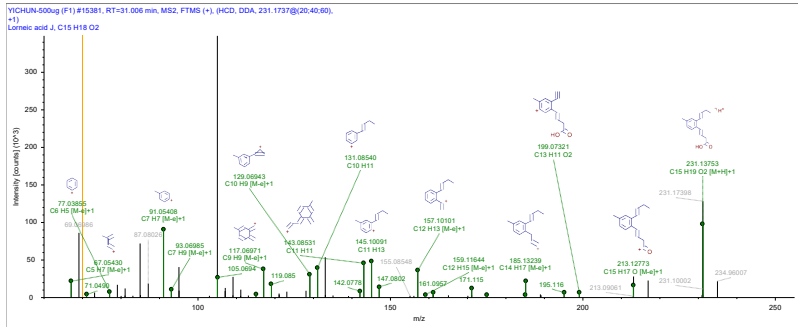

# 31.299 min (+)- $\alpha$ -Cyperone

## MS

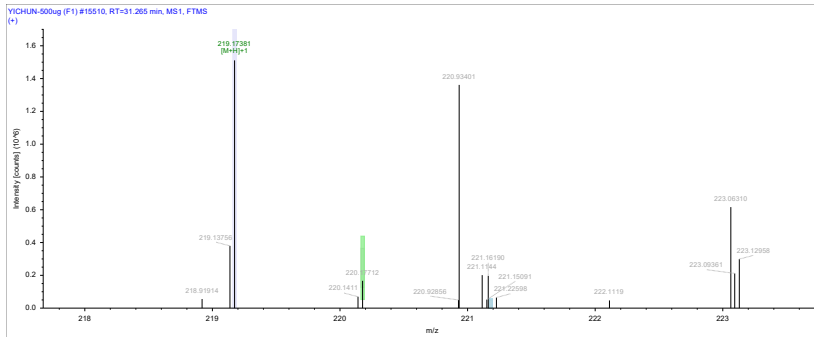

## MS/MS

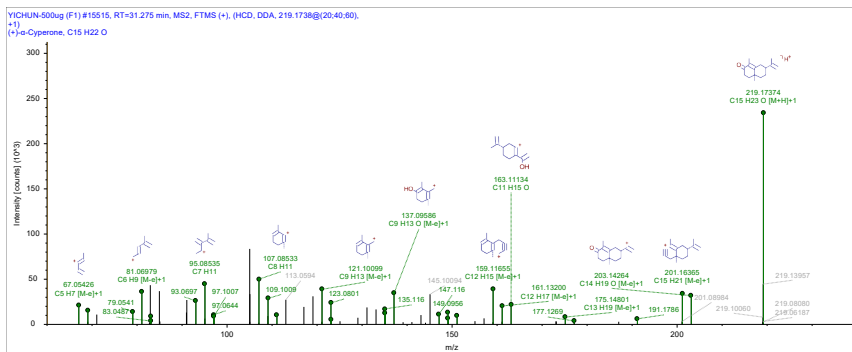

# 32.087 min Linderenyl acetate

## MS

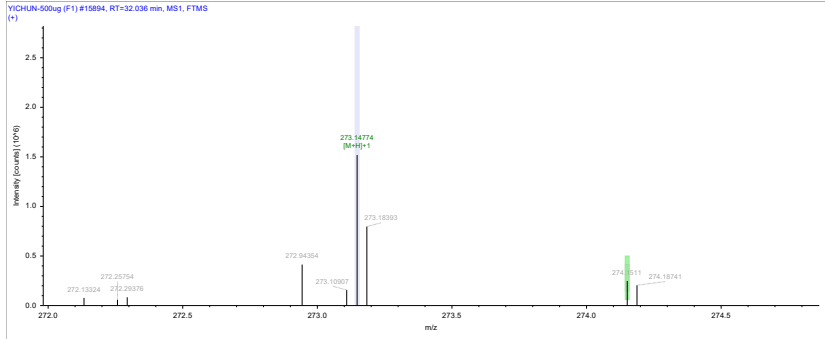

## MS/MS

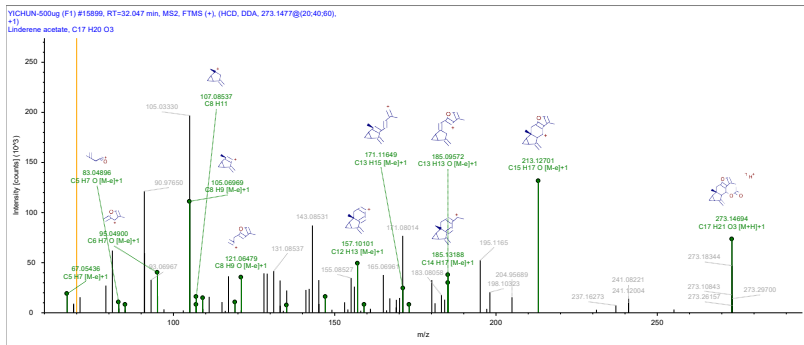

# 32.093 min Isolinderoxide

## MS

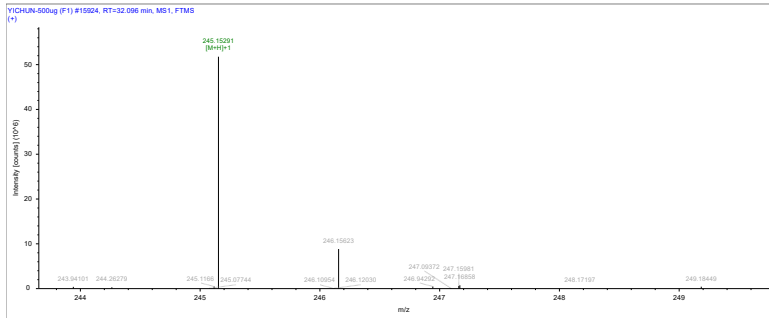

## MS/MS

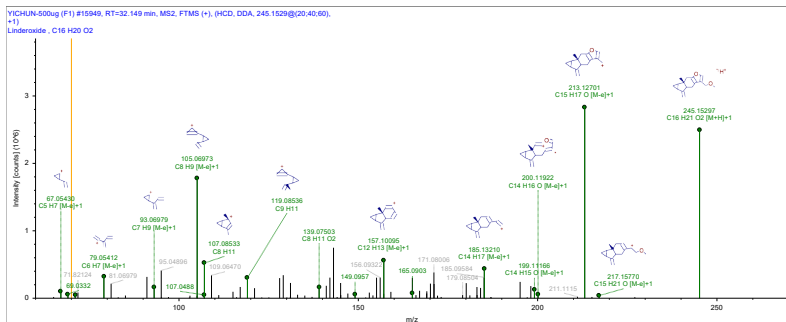

# 32.92 min (2E,3R,4S)-2-dodecylinene-3-hydroxy-4-ethoxy-4-methylbutanolide

## MS

Mix-Tie-6kinds-5ul #7950 RT: 33.04 AV: 1 NL: 1.72E9  
T: FTMS + p ESI Full ms [100.0000-1000.0000]

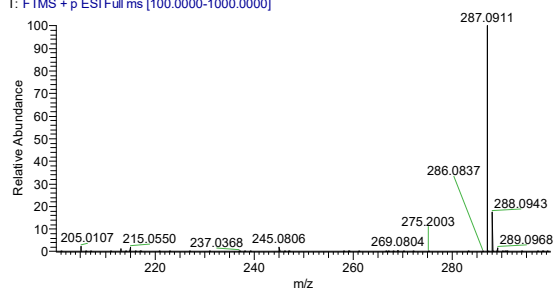

## MS/MS

Mix-Tie-6kinds-5ul #7935 RT: 32.98 AV: 1 NL: 4.80E8  
F: FTMS + p ESI d Full ms2 287.0918@hcd12.00 [50.0000-310.0000]

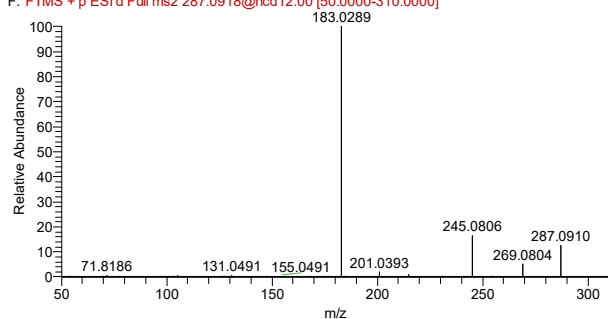

# 32.966 min (4aS,8aS)-4,4a,5,6,8a,9-Hexahydro-3,8a-dimethyl-5-methylenenaphtho[2,3-b]furan

## MS

VICHUN-500ug (F1) #18320, RT:32.89 min, MS1, FTMS (+)  
(4aS,8aS)-4,4a,5,6,8a,9-Hexahydro-3,8a-dimethyl-5-methylenenaphtho[2,3-b]furan, C15 H18

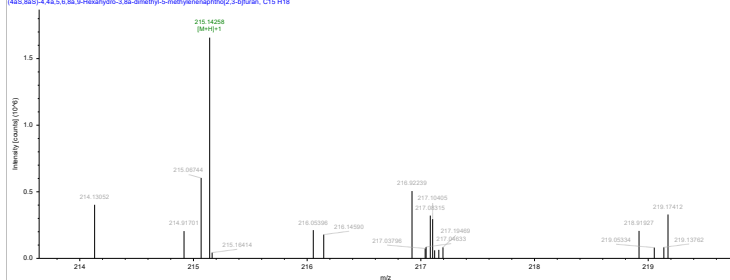

## MS/MS

VICHUN-500ug (F1) #18320, RT:32.901 min, MS2, FTMS (+), (HCD, DDA, 215.14258@20:40:60)  
(4aS,8aS)-4,4a,5,6,8a,9-Hexahydro-3,8a-dimethyl-5-methylenenaphtho[2,3-b]furan, C15 H18 O

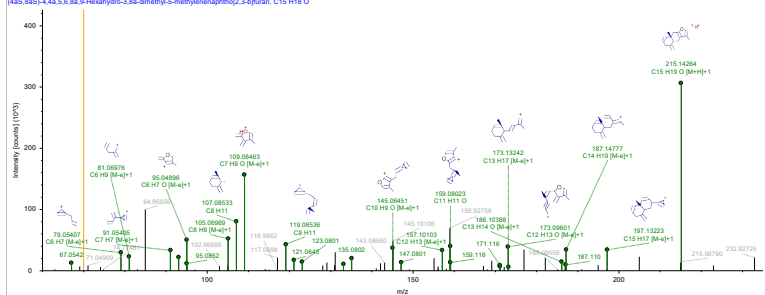

### 32.99 min 1-acetyl-4-methoxyl-denudaquinol

#### MS

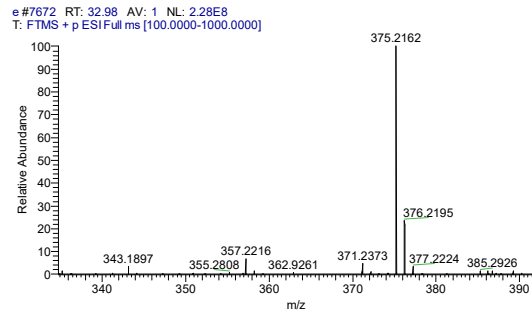

#### MS/MS

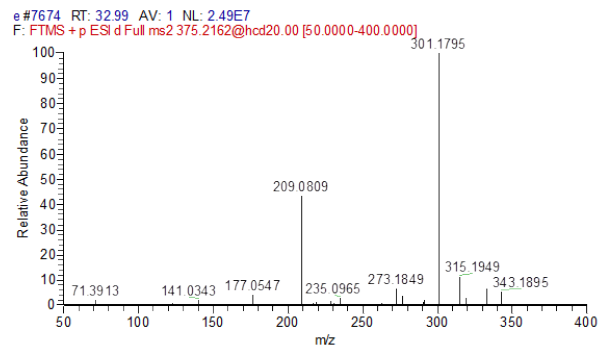

### 33.03 min methylinderone

#### MS

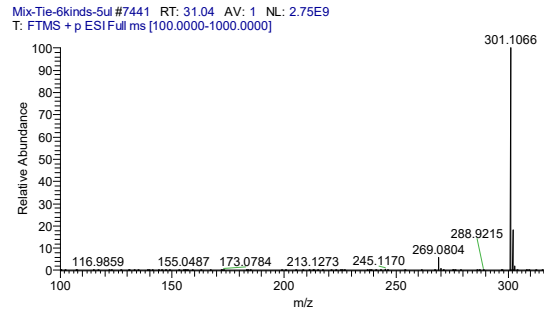

#### MS/MS

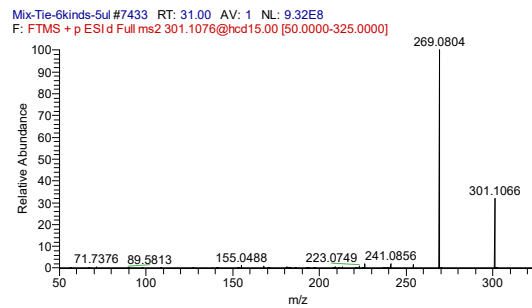

### 33.29 min linderin B

#### MS

a #8071 RT: 33.29 AV: 1 NL: 1.57E6  
T: FTMS + p ESI Full ms [100.0000-1000.0000]

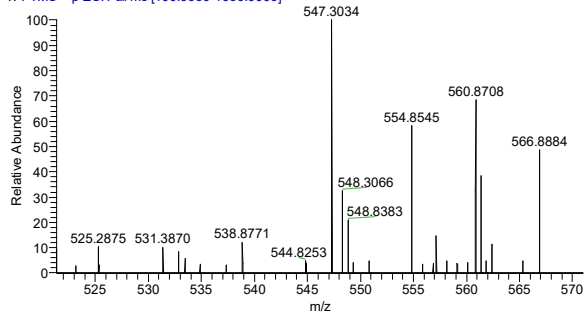

#### MS/MS

a #8064 RT: 33.27 AV: 1 NL: 3.47E4  
F: FTMS + p ESI d Full ms2 547.3035@hcd40.00 [50.0000-575.0000]

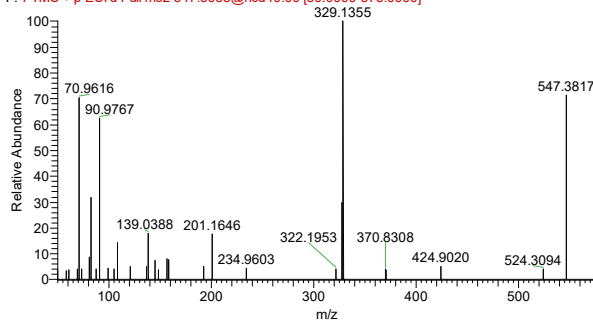

### 33.634 min Hexadecanamide

#### MS

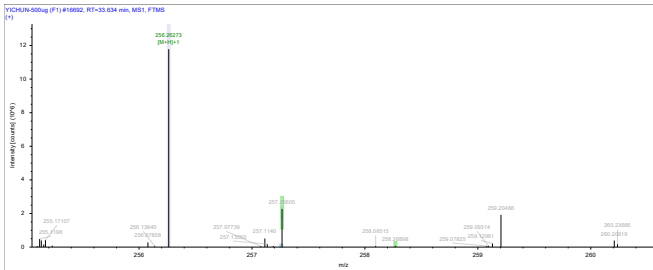

#### MS/MS

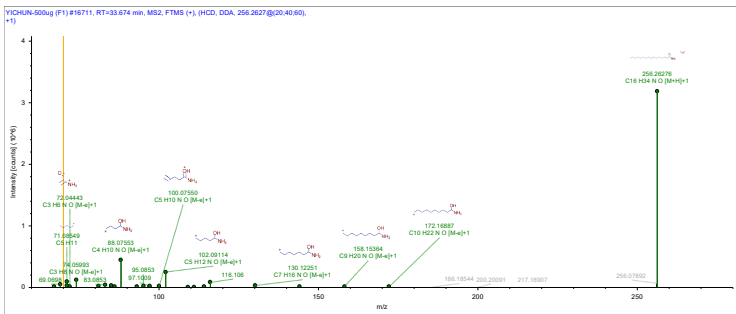

34.49 min (2E,3R,4S)-2-tetradecylinene-3-hydroxy-4-ethoxy-4-methylbutanolid

MS

1#7941 RT: 34.20 AV: 1 NL: 1.13E7  
T: FTMS + p ESI Full ms [100.0000-1000.0000]

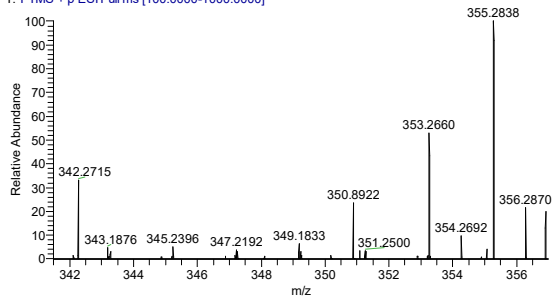

MS/MS

1#8010 RT: 34.49 AV: 1 NL: 3.96E5  
F: FTMS + p ESI d Full ms 2 355.2815@hcd52.00 [50.0000-380.0000]

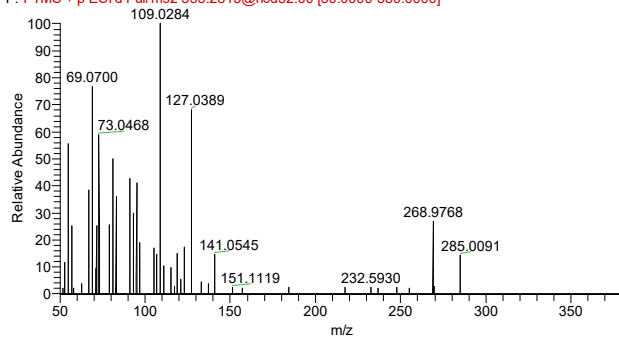

34.558 min Coniferyl aldehyde

MS

VICHUN-500ug (F1) #17154 RT=34.561 min, MS1, FTMS

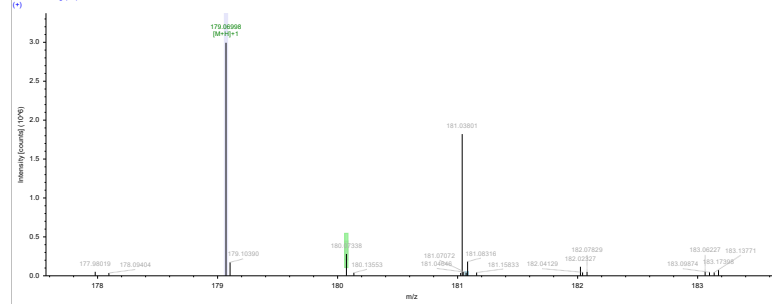

MS/MS

VICHUN-500ug (F1) #17122 RT=34.497 min, MS2, FTMS (+) (HCD, DDA, 179.0700@20.45.60)

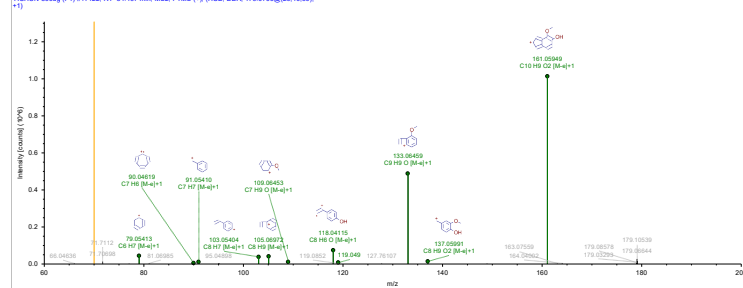

# 34.559 min Ralfuranone A

## MS

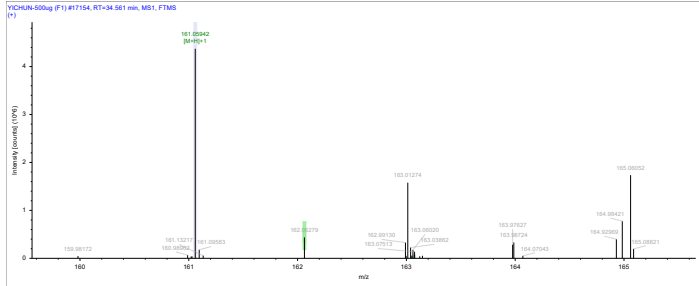

## MS/MS

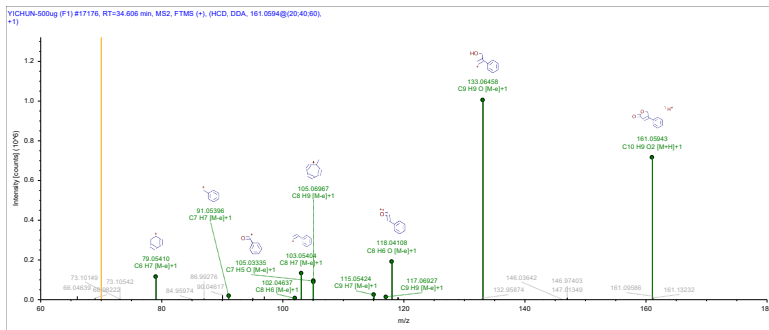

# 34.83 min lindechunisin A

## MS

b #8114 RT: 34.82 AV: 1 NL: 1.82E7  
T: FTMS + p ESI Full ms [100.0000-1000.0000]

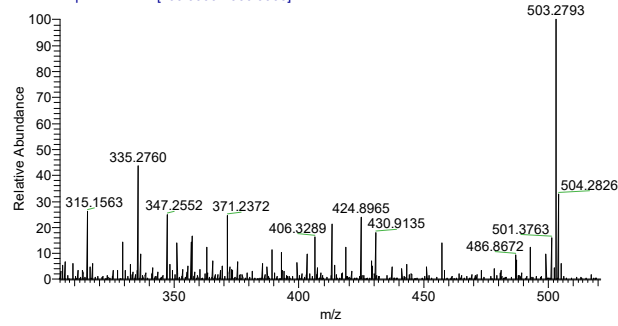

## MS/MS

b #8107 RT: 34.80 AV: 1 NL: 3.66E6  
F: FTMS + p ESI Full ms2 503.2832@hcd20.00 [50.0000-530.0000]

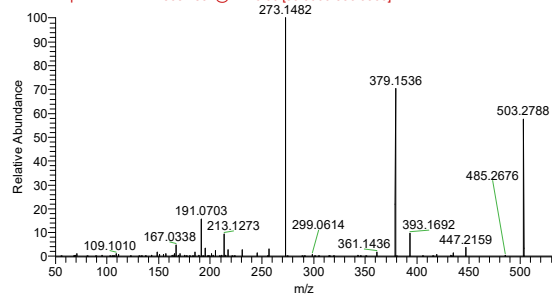

# 35.129 min Erucamide

## MS

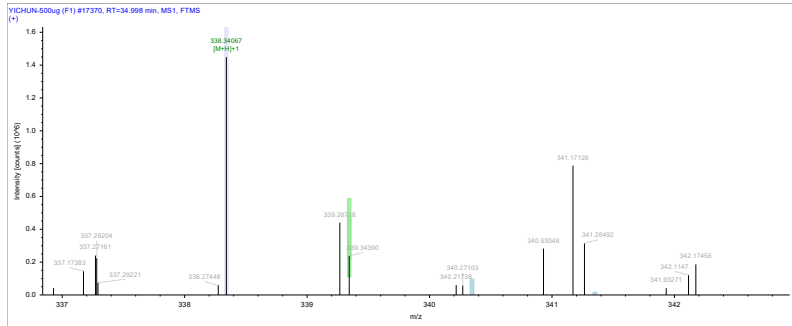

## MS/MS

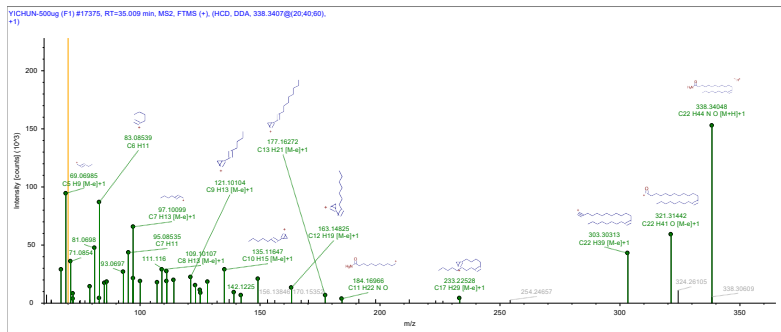

# 36.031 min Prenol

## MS

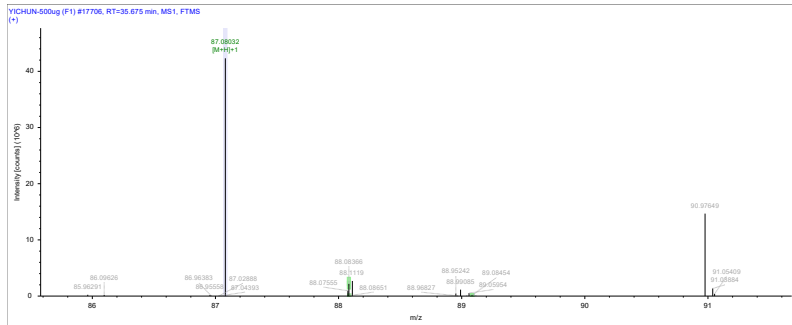

## MS/MS

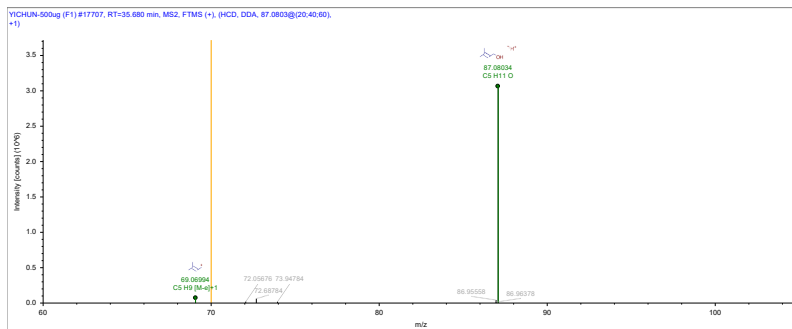



# 36.26 min Isothujone

## MS

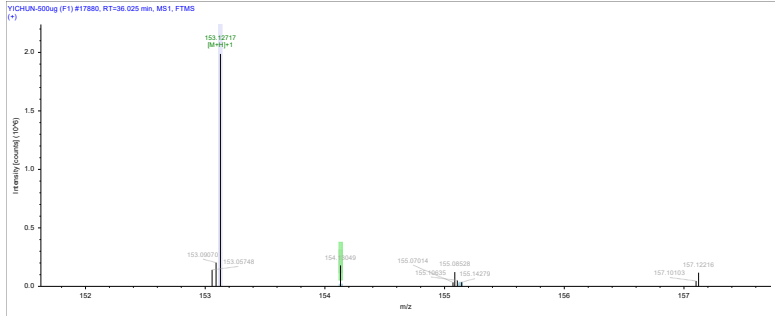

## MS/MS

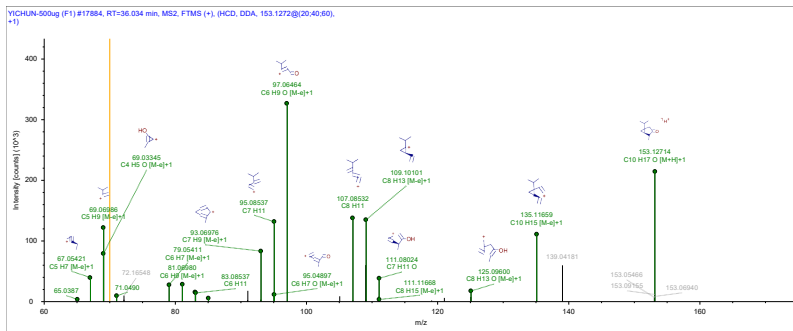

# 36.486 min Hexadecan-2-one

## MS

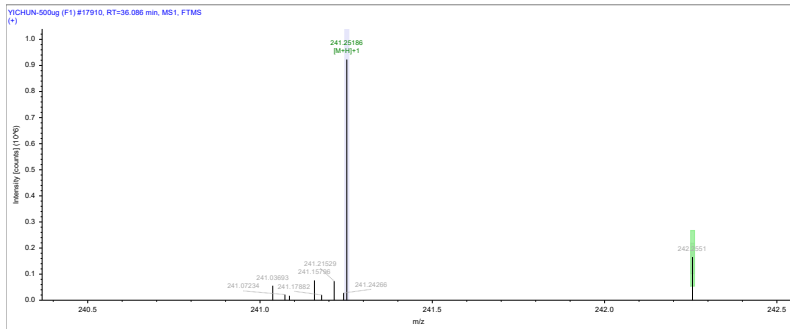

## MS/MS

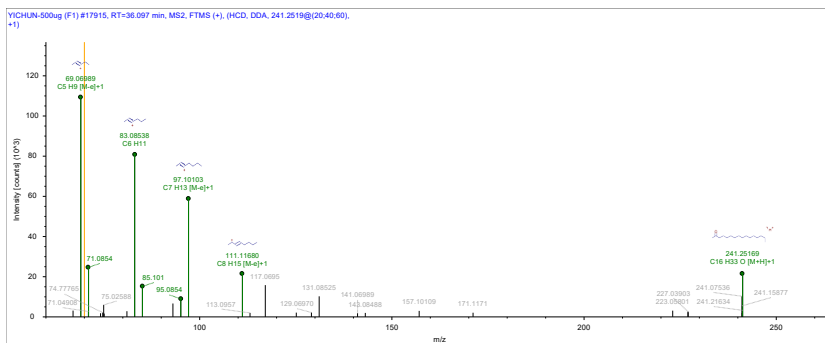

# 36.858 min Solwaric acid A

## MS

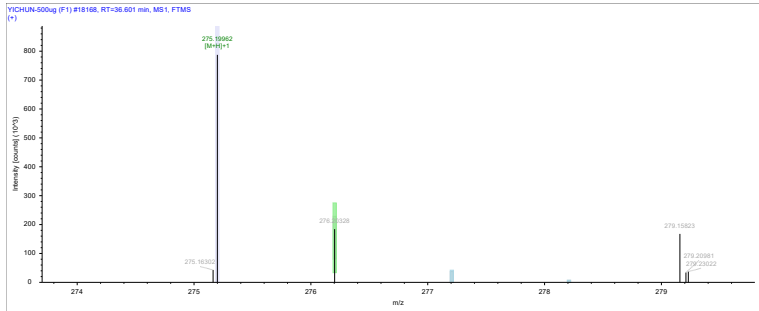

## MS/MS

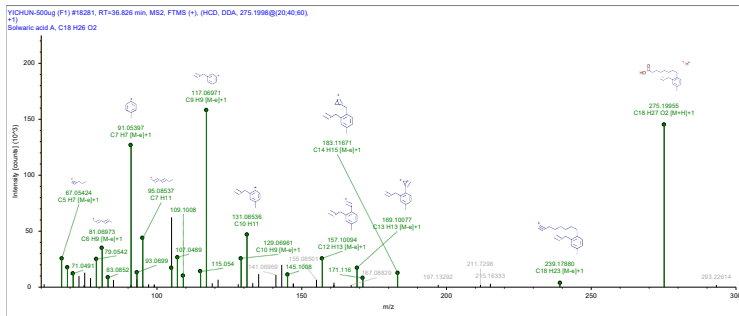

# 36.873 min Isoprenol

## MS

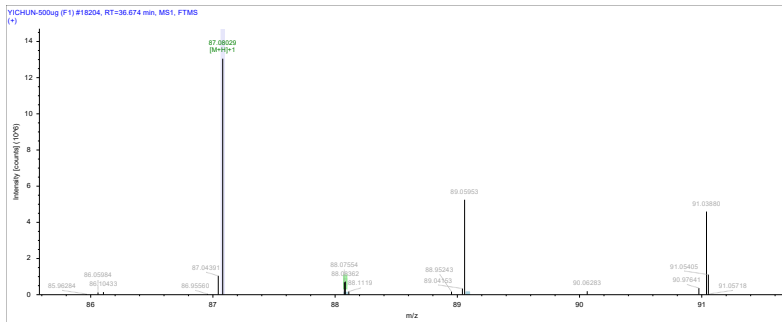

## MS/MS

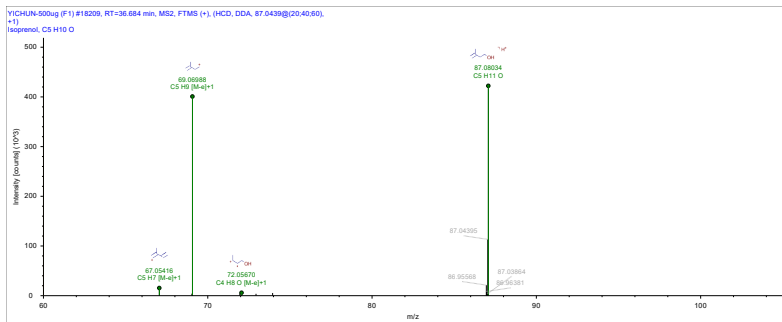

Supplement: d4ra05643d1.pdf [file d4ra05643d1.pdf]
